# A Multifactorial Approach to Hepatobiliary Transporter Assessment Enables Improved Therapeutic Compound Development

Ryan E. Morgan,<sup>\*,1</sup> Carlo J. van Staden,<sup>†</sup> Yuan Chen,<sup>\*</sup> Natarajan Kalyanaraman,<sup>‡</sup> Jackson Kalanzi,<sup>\*</sup> Robert T. Dunn II,<sup>\*</sup> Cynthia A. Afshari,<sup>\*</sup> and Hisham K. Hamadeh<sup>\*</sup>

<sup>\*</sup>Department of Comparative Biology and Safety Sciences, Discovery Toxicology, <sup>†</sup>Department of Molecular Structure and Characterization, and <sup>‡</sup>Department of Pharmacokinetics and Drug Metabolism, Amgen Inc, Thousand Oaks, California 91320

<sup>1</sup>To whom correspondence should be addressed at the Department of Comparative Biology and Safety Sciences, Amgen Inc, One Amgen Center Drive., 14-1-B, Thousand Oaks, CA 91320. Fax: (805) 375-9792. E-mail: [remorgan@amgen.com](mailto:remorgan@amgen.com).

Received June 19, 2013; accepted August 9, 2013

The bile salt export pump (BSEP) is expressed at the canalicular domain of hepatocytes, where it serves as the primary route of elimination for monovalent bile acids (BAs) into the bile canaliculi. The most compelling evidence linking dysfunction in BA transport with liver injury in humans is found with carriers of mutations that render BSEP nonfunctional. Based on mounting evidence, there appears to be a strong association between drug-induced BSEP interference and liver injury in humans; however, causality has not been established. For this reason, drug-induced BSEP interference is best considered a susceptibility factor for liver injury as other host- or drug-related properties may contribute to the development of hepatotoxicity. To better understand the association between BSEP interference and liver injury in humans, over 600 marketed or withdrawn drugs were evaluated in BSEP expressing membrane vesicles. The example of a compound that failed during phase 1 human trials is also described, AMG 009. AMG 009 showed evidence of liver injury in humans that was not predicted by preclinical safety studies, and BSEP inhibition was implicated. For 109 of the drugs with some effect on *in vitro* BSEP function, clinical use, associations with hepatotoxicity, pharmacokinetic data, and other information were annotated. A steady state concentration ( $C_{ss}$ ) for each of these annotated drugs was estimated, and a ratio between this value and measured  $IC_{50}$  potency values were calculated in an attempt to relate exposure to *in vitro* potencies. When factoring for exposure, 95% of the annotated compounds with a  $C_{ss}/BSEP IC_{50}$  ratio  $\geq 0.1$  were associated with some form of liver injury. We then investigated the relationship between clinical evidence of liver injury and effects to multidrug resistance-associated proteins (MRPs) believed to play a role in BA homeostasis. The effect of 600+ drugs on MRP2, MRP3, and MRP4 function was also evaluated in membrane vesicle assays. Drugs with a  $C_{ss}/BSEP IC_{50}$  ratio  $\geq 0.1$  and a  $C_{ss}/MRP IC_{50}$  ratio  $\geq 0.1$  had almost a 100% correlation with some evidence of liver injury in humans. These data suggest that integration of exposure data, and knowledge of an effect to not only BSEP but also one or more of the MRPs, is a useful tool for informing the potential for liver injury due to altered BA transport.

**Key Words:** bile salt export pump; bile acid; transporter; ATP-binding cassette transporter; multidrug resistance-associated protein; drug-induced liver injury.

Drug-induced liver injury (DILI) is a major concern for the pharmaceutical industry, accounting for clinical drug failures, market withdrawals, as well as black box warnings (Olson *et al.*, 2000; Stine and Lewis, 2011). Such late stage attrition or use limitations due to liver injury is a clear sign that traditional preclinical models can be poor predictors of human DILI. Indeed, the efforts of a consortium comprised of several pharmaceutical companies published by Olson *et al.* (2000) evaluated the concordance between preclinical animal safety data and human clinical outcomes for 150 development compounds and found that hepatotoxicity (< 60% concordance) and cutaneous/hypersensitivity reactions (< 40% concordance) were the 2 poorest predicted adverse events (Olson *et al.*, 2000). Hepatotoxicity was responsible for the second highest termination rate for these compounds (Olson *et al.*, 2000). As they pointed out, there is a need to discover the underlying mechanisms for DILI in order to develop tools (eg, *in vitro*, *ex vivo*, or other models) to better predict hepatotoxicity in humans (Olson *et al.*, 2000). The often low incidence of DILI seen during the postmarketing phase of drug development adds to the challenge of identifying the underlying mechanisms of hepatotoxicity, compounded by a diverse patient population exposed to almost innumerable confounding variables (Stine and Lewis, 2011). Several reviews have focused on DILI and the possible contributing mechanisms, such as reactive metabolite formation and covalent binding, immune-mediated toxicity, mitochondria toxicity in its various forms, and hepatobiliary transporter inhibition (Amacher, 2012; Corsini *et al.*, 2012; Daly, 2010; Kubitz *et al.*, 2012; Stepan *et al.*, 2011; Tujjos and Fontana, 2011). In the case of hepatobiliary transporter inhibition, rodents have

been demonstrated to be an unreliable model for hepatotoxicity due to inhibition of bile salt export pump (Bsep) function (Fattinger *et al.*, 2001; Feng *et al.*, 2009; Kostrubsky *et al.*, 2003, 2006). An additional example is provided in the present work—AMG 009. This compound showed no evidence of liver injury in rats, mice, hamsters, rabbits, or nonhuman primates; however, 5 of 8 healthy volunteers showed significant elevations in transaminases that returned to normal upon cessation of AMG 009 administration (data not shown). And, the exposures in blood achieved in the preclinical animal models were greater than those observed in humans. AMG 009 was subsequently discovered to interact with multiple hepatocellular transporters, including BSEP. Experience with this compound adds to the examples published by others, demonstrating how BSEP inhibition can be a liability for DILI that goes undetected during preclinical testing.

Although an essential component of bile, bile acids (BAs) are detergent-like molecules capable of damaging cellular membranes and organelles (Lundell and Wikvall, 2008; Palmeira and Rolo, 2004; Rolo *et al.*, 2004). To mitigate potential cytotoxicity, BA homeostasis is tightly regulated by metabolic, excretion, absorption, and feedback mechanisms to limit their intracellular accumulation (Trauner and Boyer, 2003). Several works describe in detail these processes and their relationship to health and disease (Stieger, 2010; Stieger *et al.*, 2000; Trauner and Boyer, 2003). An understanding of the association between BSEP dysfunction and liver injury through genetic mutations is what led to the hypothesis that some forms of DILI may be due to a BSEP-mediated mechanism (Fattinger *et al.*, 2001). Indeed, several drugs or drug candidates have been associated with liver injury in humans and with BSEP interference implicated as a possible contributing factor (Fattinger *et al.*, 2001; Feng *et al.*, 2009; Kostrubsky *et al.*, 2003, 2006; Morgan *et al.*, 2010). However, it is challenging to ascribe sole causality to BSEP interference given the possibility of other drug- or host-mediated mechanisms.

BSEP is an ATP-dependent transporter that manages the excretion of monovalent BAs into the bile canaliculi, with greater affinity for amidated (amino acids glycine or taurine) BAs (Stieger *et al.*, 2007). At physiological pH, BAs exist in their salt form; however, they are referred to as BAs throughout this work (Lundell and Wikvall, 2008). BAs are efficiently recycled through either enterohepatic circulation (the major pathway) or the chol-hepatic shunt pathway, where approximately 95% of the human BA pool is recycled daily (Lundell and Wikvall, 2008). BAs are reclaimed into blood through either the intestines (enterohepatic circulation) or cholangiocytes (chol-hepatic shunt) and then make their way back to the liver. Hepatic uptake transporters, predominantly the sodium-dependent taurocholate cotransporting polypeptide, then complete the BA recycling process. Under conditions such as progressive familial intrahepatic cholestasis type 2 or BSEP deficiency, the hepatocyte loses its primary route of BA excretion into the bile canaliculi and results in the hepatocellular

accumulation of BAs up to cytotoxic concentrations (Palmeira and Rolo, 2004; Rolo *et al.*, 2003, 2004). Under such cholestatic conditions, the multidrug resistance-associated proteins-2, -3, and -4 (MRP2/ABCC2, MRP3/ABCC3, and MRP4/ABCC4) are described as “emergency safety valves” to help manage the canalicular (MRP2) or basolateral (MRP3 and MRP4) elimination of BAs (Keppler, 2011a,b). An illustration of this is provided in Figure 1.

MRP2 is responsible for the canalicular secretion of phase 2 conjugated BAs. Unlike BSEP, MRP2 has a long list of substrates aside from BAs, including various glucuronidated or sulfated drugs and/or their metabolites, and endogenous compounds such as conjugated bilirubin and leukotriene C4 (LTC4) (Nies and Keppler, 2007; Zhou *et al.*, 2008). In the case of conjugated bilirubin, genetic mutations in ABCC2 that render MRP2 dysfunctional are the cause of Dubin-Johnson syndrome, which presents as jaundice due to hyperbilirubinemia (Nies and Keppler, 2007). At the basolateral domain, MRP3 is primarily responsible for the elimination of glucuronidated endogenous and xenobiotic compounds. An important substrate for MRP3 is conjugated bilirubin, allowing for its elimination into the blood. In fact, increased MRP3 expression has been observed in individuals with Dubin-Johnson syndrome (Keppler, 2011b). Significant interspecies differences have been observed between rodent Mrp3 transport of BAs and human MRP3. Rodent Mrp3 transports BAs with high affinity, but human MRP3 with relatively low affinity (Keppler, 2011b). The other basolateral efflux pump capable of transporting BAs is MRP4, however, only in the presence of glutathione (GSH) (Keppler, 2011b). Other substrates of MRP4 include cyclic nucleotides, such as 3'-5'-cyclic adenosine monophosphate, leukotrienes, prostaglandins, and many others (Keppler, 2011b). Similar to MRP4 BA transport, several of its other substrates require GSH cotransport. MRP3 and MRP4 are likely less involved in the elimination of BAs under normal, homeostatic conditions but play an important compensatory role during cholestasis.

In a survey of over 200 benchmark drugs using the human BSEP membrane vesicle assay, the majority of compounds with an  $IC_{50}$  value of  $< 25\mu\text{M}$  were associated with liver injury in humans (Morgan *et al.*, 2010). Good concordance was shown in a subsequent study, also using BSEP membrane vesicles (Dawson *et al.*, 2012). These works, and others, support that deployment of an early screening paradigm around BSEP may add to a weight-of-evidence risk assessment for hepatotoxicity. However, some compounds were identified in Morgan *et al.* (2010) or Dawson *et al.* (2012) as BSEP inhibitors with no convincing evidence of liver injury. Further, the assays could not discriminate severity or frequency of DILI. It was therefore hypothesized that knowledge of a compound's effect on the other major BA efflux transporters (MRP2, MRP3, and MRP4), in addition to BSEP, may help further discriminate compounds and limit false positives (compounds with no convincing evidence of DILI). In addition to the 200+ benchmark compounds reported in Morgan *et al.* (2010), more than 400

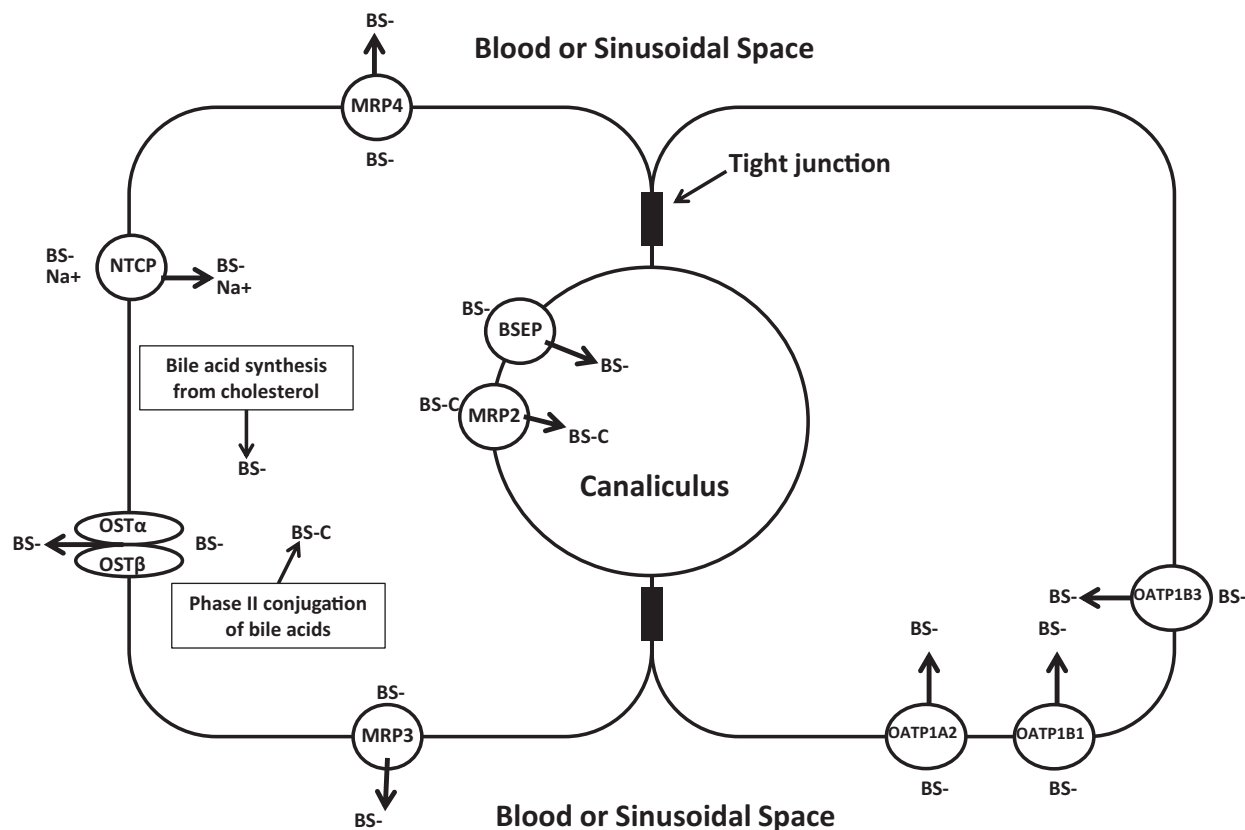

**FIG. 1.** Illustration of the hepatocellular transporters predominantly involved in bile acid (BA) homeostasis. BAs are synthesized from cholesterol within the hepatocyte. Additional processing of the BAs include conjugation to the amino acids glycine or taurine (amino acid conjugated and unconjugated BAs depicted as BS<sup>-</sup>). Other reactions may render BAs as phase 2 metabolized species—such as glucuronidated or sulfated BAs (represented as BS-C). BAs are then transported into the bile canaliculi via BSEP, or if a BS-C species, they are transported by MRP2. Under cholestatic conditions, MRP3 and MRP4 play a compensatory role in managing the elimination of BAs into the blood, whereby limiting the hepatocellular accumulation of BAs. NTCP is the primary route by which hepatocytes reclaim BAs from blood; however, the organic anion-transporting polypeptide (OATPs) do represent a non-sodium-dependent means for BA uptake. The organic solute transporter subunits  $\alpha$  and  $\beta$  (OST $\alpha$  and OST $\beta$ ) also play a role in the basolateral elimination of BAs; however, less is known about their function within hepatocytes. Not all transporters or substrates are depicted in this figure. Abbreviations: BSEP, bile salt export pump; MRP, multidrug resistance-associated protein; NTCP, Sodium-dependent taurocholate cotransporting polypeptide; OST, organic solute transporter.

additional drugs were evaluated in the human BSEP membrane vesicle assay and similar human MRP2, MRP3, and MRP4 assays. Potency values for over 600 benchmark drugs were generated for the 4 transporters in the form of IC<sub>50</sub> values. Where available through such resources as Pharmapendium ([www.pharmapendium.com](http://www.pharmapendium.com)), the LiverTox database ([www.livertox.nih.gov](http://www.livertox.nih.gov)), literature searches via PubMed ([www.ncbi.nlm.nih.gov/pubmed](http://www.ncbi.nlm.nih.gov/pubmed)), and/or product labels, toxicology, pharmacology, pharmacokinetic, and other information are provided for 109 drugs, focused mainly on those with an effect on BSEP transport. The Dawson *et al.* (2012) work attempts to move beyond the use of a cutoff potency value to identify potentially hazardous compounds based on *in vitro* BSEP findings by incorporating *in vivo* exposure data into the assessment. To expand on their effort, *in vitro* potency values for the 109 drugs with annotated toxicology and pharmacokinetic data were related to exposure to provide a better extrapolation to human outcome.

The overall objectives of this work are (1) to demonstrate the utility of evaluating BSEP and the MRPs by surveying the effects of a large number of marketed or withdrawn drugs in functional *in vitro* transporter assays; (2) to demonstrate the utility of incorporating blood exposure data into a risk assessment for transporter inhibition by curating relevant information on a subset of the marketed or withdrawn drugs; and (3) to provide a recommendation on how to deploy a transporter panel to improve therapeutic compound development.

## MATERIALS AND METHODS

**Materials.** Inverted membrane vesicles harvested from Sf9 insect cells overexpressing human BSEP, MRP2, MRP3, or MRP4 (catalog numbers GM0005, GM0001, GM0021, or GM0012, respectively) were manufactured by Genomembrane (Kanagawa, Japan) and purchased through Life Technologies (Grand Island, New York). Radioactive substrates for the membrane vesicle assays <sup>3</sup>H-taurocholate (<sup>3</sup>H-T) for BSEP or <sup>3</sup>H-estradiol-17 $\beta$ -D-glucuronide

( $^3\text{H-E}_2\text{17}\beta\text{G}$ ) for the MRPs were purchased from Perkin Elmer (Waltham, Massachusetts). All other reagents and buffers for the membrane vesicle assays were of the highest grade possible and were exactly as described in van Staden *et al.* (2012). Where available, 635 test articles (mostly comprised of marketed or withdrawn drugs) were purchased through Sigma (St Louis, Missouri), Biomol (Plymouth Meeting, Pennsylvania), and Sequoia Research Products (Pangbourne, United Kingdom). AMG 009 was synthesized at Amgen Inc (Newbury Park, California). Some test articles were selected based on previous reports of BSEP inhibition; however, the majority of test articles were acquired based solely on their availability, with no knowledge of their potential effect on BSEP, MRP2, MRP3, or MRP4. All test articles were solubilized in dimethyl sulfoxide (DMSO) to a top concentration of 10mM and then stored in a freezer set to maintain  $-20^\circ\text{C}$  until ready for use.

**Membrane vesicle transport assay.** The authors of the present work recently published a detailed protocol for BSEP, MRP2, MRP3, and MRP4 membrane vesicle assays in *Current Protocols in Toxicology* (van Staden *et al.*, 2012). The methods and data analyses performed in the present work were exactly as described in van Staden *et al.* (2012). The van Staden *et al.* publication also provides a detailed overview of the assays, diagrams of the workflow, and helpful illustrations. Briefly, plasma membrane vesicles expressing human BSEP, MRP2, MRP3, or MRP4 were incubated with a radiolabeled substrate ( $^3\text{H-T}$  for BSEP or  $^3\text{H-E}_2\text{17}\beta\text{G}$  for the MRP assays) in the presence or absence of 4mM ATP. The absence of ATP served as the negative control, and resulting radioactivity when exposed to vehicle alone (1.3% DMSO) was considered background or noise. The with-ATP controls and 1.3% DMSO represented true signal. For the MRP2 and MRP3 assays, 2mM GSH was also added to the reaction. The BSEP assay was performed at room temperature, with an incubation time of 15–20min. The MRP2, MRP3, and MRP4 assays were performed at  $37^\circ\text{C}$ . The incubation time for MRP2 and MRP4 was 20min, and for MRP3, it was 10min. All test articles were evaluated at 10 concentrations, in 1/3 increments, spanning 0–133 $\mu\text{M}$ . Nonlinear regression analysis was performed, and  $\text{IC}_{50}$  values generated as an estimate of potency as described elsewhere (Morgan *et al.*, 2010; van Staden *et al.*, 2012).

**Annotation of select drugs.** One hundred and nine of the benchmark drugs evaluated in this work were annotated for their known association with hepatotoxicity, pharmacokinetic data in the form of area under the concentration versus time curve (AUC), indication/pharmacology, route of excretion, dose levels and frequencies, as well as other information to explore the relationship between *in vitro* transporter effects and evidence of liver injury in humans. An additional 21 compounds have partial annotations. The basis for selecting compounds to annotate was *in vitro* evidence of some level of BSEP inhibition in the present test system. Annotations were collated from the literature, product labels, the LiverTox database (<http://livertox.nih.gov/>), and/or Pharmapendium version 2.5–2.7 (database version 2010.1–2012.6) (Elsevier Properties, SA; New York, New York), which included Mosby's Drug Consult and Meyler's Side Effect of Drugs. Where available, links to the LiverTox database are provided. For the purposes of this work, the definition for convincing evidence of liver injury is the following: black box warning, one or more literature references to liver injury in humans, evidence of liver injury was summarized in the LiverTox database, and/or mention of liver injury in Mosby's Drug Consult or Meyler's Side Effect of Drugs. The AUC parameter was annotated from Pharmapendium, drug labels, and/or the literature. The top clinically relevant dose used to derive AUC data was selected, when possible. In some instances, median values were estimated. Where annotated, AUC data were divided by dose interval to estimate a concentration at steady state ( $C_{ss}$ ).  $C_{ss}$  values were compared with transporter  $\text{IC}_{50}$  potency values by calculating the ratio of  $C_{ss}$  / transporter  $\text{IC}_{50}$  as a means of relating exposure to *in vitro* potencies.

**Liver and plasma exposure of AMG 009 in rats.** Male Sprague Dawley rats, 10–11 weeks of age (weight appropriate to age), were acquired from Charles River Laboratories (Wilmington, Massachusetts). All animals were cared for in accordance to the *Guide for the Care and Use of Laboratory Animals, 8th Edition* (National Research Council (U.S.). Committee for the Update of the Guide for the Care and Use of Laboratory Animals, Institute for

Laboratory Animal Research (U.S.), National Academies Press (U.S.), 2011). Animals were group housed (3 per cage) at an AAALAC, Intl-accredited facility in nonsterile ventilated microisolator housing with corn cob bedding. All research protocols were approved by the Institutional Animal Care and Use Committee. Animals had *ad libitum* access to pelleted feed and water (reverse osmosis purified) via an automatic watering system. Animals were maintained on a 12:12-h light:dark cycle in rooms with controlled temperature and humidity and had access to enrichment opportunities.

Three rats were assigned to each of 8 groups, for a total of 24 animals. Animals either received a single PO administration (gavage) of vehicle alone (water, pH 9.0 with NaOH) or 1500mg/kg of AMG 009. The vehicle group was euthanized approximately 0.5h postadministration, at which time blood was collected in lithium heparin tubes and processed for plasma, and the livers frozen in liquid nitrogen for determination of AMG 009 concentrations. The remaining 21 animals received 1500mg/kg AMG 009 and were euthanized at 0.5, 1, 2, 4, 6, 24, or 48h postdose, with plasma and liver collected as described above. Liquid chromatography/tandem mass spectrometry using electrospray ionization and multiple reaction monitoring in the positive ion mode was used for the bioanalysis of rat plasma and liver samples. The lower limit of quantitation for AMG 009 was 0.5ng/ml for plasma and 20ng/g for liver (Watson, Non-GLP PROD, version 7.0.0.1, Thermo Electron Corporation).

## RESULTS

Over 600 drugs were selected for evaluation in a membrane vesicle transporter panel,  $\text{IC}_{50}$  values were generated, and clinical information was annotated for a subset of these drugs to assess the predictivity of liver injury outcome.  $\text{IC}_{50}$  values for the annotated compounds were normalized to  $C_{ss}$  to determine whether or not an appreciation for exposure further improved the prediction of liver injury outcome.

As seen in Figure 2, most of the 635 benchmark compounds evaluated in the BSEP membrane vesicle assay had little or no effect. This result is similar to what was published earlier

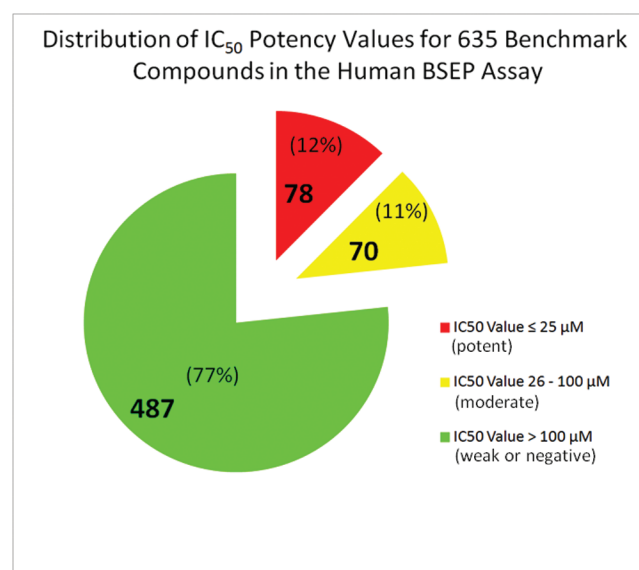

**FIG. 2.** A pie chart illustrates the percentage of compounds binned as either potent, moderate, or negative for 635 compounds evaluated in the human bile salt export pump (BSEP) assay. The majority of marketed drugs were negative for BSEP.

following evaluation of approximately 200 benchmark compounds, where 75% had little or no effect, 9% had an  $IC_{50}$  value 26–100  $\mu$ M, and 16% of the compounds had an  $IC_{50}$  value  $\leq$  25  $\mu$ M (Morgan *et al.*, 2010). All of the compounds included in the previous publication are included in the present 635 compound data set.

Of the 635 compounds evaluated for BSEP activity, 623 were evaluated for activity in the MRP2, MRP3, and MRP4 assays. Figure 3 is the hierarchical cluster analysis of  $IC_{50}$  values derived from all 623 compounds in the BSEP, MRP2, MRP3, and MRP4 assays. This illustration clearly shows how compounds can be distinguished into 3 major bins: no effect on all 4 transporters (the largest bin), an effect on one of the transporters, and an effect on more than one transporter. In Figure 3, the white cells in the MRP2 column indicate compounds that stimulated MRP2 transport of the reporter substrate, or stimulated at lower concentrations then inhibited at higher concentrations. It is known that transport of the MRP2 reporter substrate,  $E_217\beta$ G, can be stimulated in the presence

of some compounds, stimulated at lower concentrations but inhibited at higher concentrations for other compounds, and just inhibited by yet others (Nies and Keppler, 2007; Pedersen *et al.*, 2008; Zhou *et al.*, 2008). These phenomena are likely due to multiple binding sites on MRP2 that contribute to differential transport kinetics (Gerk *et al.*, 2004). There is substantial overlap and good concordance between compounds presented in this data set and those reported by others in a survey of over 200 drugs on MRP2 transport, with few exceptions (Pedersen *et al.*, 2008). However, 2 compounds described as classic MRP2 inhibitors (benzbromarone and MK-571) were less potent in the MRP2 assay as presented here (Pedersen *et al.*, 2008). These 2 compounds were evaluated several times, and the results varied little. Either these compounds are not as potent MRP2 inhibitors as has been described previously, or differences in experimental conditions may explain the different results. For example, GSH in the assay system can alter the effect of MK-571 on MRP2 transport (Letourneau *et al.*, 2005). Only 3 of the 623 compounds evaluated in the transporter panel

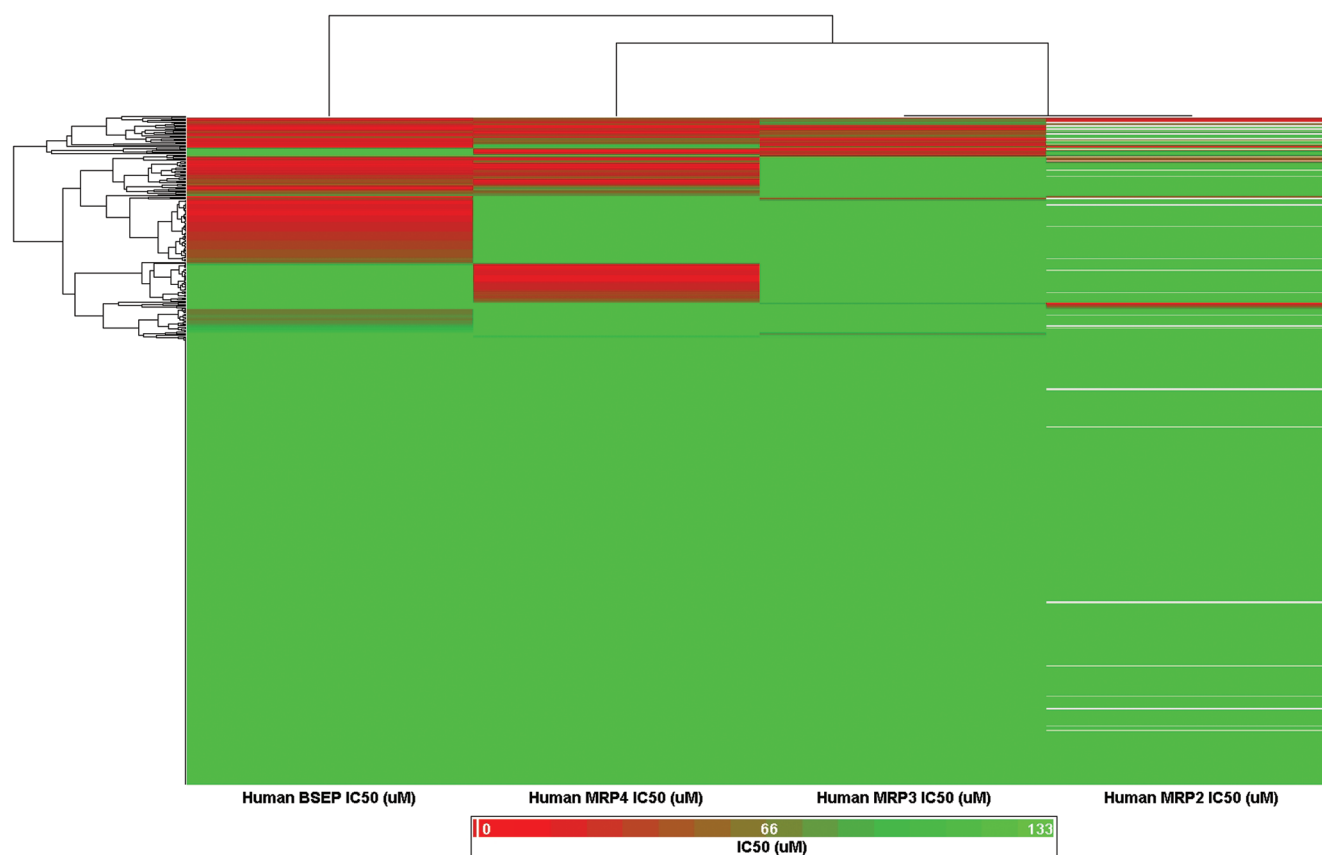

**FIG. 3.** Hierarchical cluster analysis (Euclidean row and column dissimilarity, average linkage row and column methods, agglomerative clustering method) performed in Partek Discovery Suite 6.4. The more potent a compound inhibits a transporter, the more red the cell, and therefore the lower the  $IC_{50}$  value. The less potent a compound inhibits a transporter, the more green the cell, and therefore the higher the  $IC_{50}$  value. This figure illustrates the effect of 623 compounds on all 4 transporters. Gray areas in the MRP2 column indicate that the compound either stimulated or stimulated then inhibited MRP2 transport of  $E_217\beta$ G. Abbreviations: BSEP, bile salt export pump; MRP, multidrug resistance-associated protein.

appeared to be relatively selective MRP2 inhibitors of E<sub>2</sub>17βG transport (ethacrynic acid, daptomycin, and suramin), with IC<sub>50</sub> values < 50 μM.

The proximity of compounds to one another in Figure 3 indicates similar patterns of effect across the transporter panel (with some bias due to absent MRP2 values). Compounds with similar pharmacological mechanisms of action tended to cluster similarly in Figure 3. For example, kinase inhibitors tended to affect BSEP and MRP4 function, whereas peroxisome proliferator-activated receptor (PPAR) agonists rosiglitazone, pioglitazone, and troglitazone tended to inhibit BSEP and MRP4 while stimulating MRP2 function. Interestingly, rosiglitazone and pioglitazone had no effect on MRP3, whereas troglitazone had an inhibitory effect, thus distinguishing it from rosiglitazone and pioglitazone. Compounds that inhibited BSEP and MRP4, with or without effects to MRP2 or MRP3 function, included the kinase inhibitors, leukotriene inhibitors, endothelin antagonists, and nonsteroidal anti-inflammatory drugs, along with drugs representing other pharmacologic targets.

In an attempt to relate the effect of these benchmark drugs to their clinical outcome, Table 1 was created. Biased toward compounds with some effect on BSEP transport, 121 benchmark compounds are listed in this table. Where available, links to the LiverTox database are provided. This is particularly important given that the column summarizing known clinical outcome was populated subjectively, and the opinion as to what constitutes hepatotoxicity (ie, frequency beyond background occurrence) may vary. Known clinical outcomes, pharmacology and pharmacokinetic data were populated for 109 of these compounds as described in the Materials and Methods section. The individual IC<sub>50</sub> values for all 635 compounds presented here are provided in Supplementary Table 1. This table also contains the annotations provided in Table 1 to allow for further analysis of these data and refinement of the annotations (eg, identify the specific type of hepatotoxicity: cholestasis, hepatocellular, mixed hepatocellular, or steatosis). Where an IC<sub>50</sub> value of 133 μM is listed, this is not an actual IC<sub>50</sub>. This is the top concentration at which all compounds were tested and implies that the compound either had no effect on transporter function or the effect was insufficient to fit a curve using the regression analysis methods cited in this work.

The AUC parameter was selected to represent exposure. To estimate the C<sub>ss</sub>, the AUC was divided by dose intervals. AUC values were acquired as described in the Materials and Methods section. To relate the exposure values to the transporter data, C<sub>ss</sub> concentrations were divided by the IC<sub>50</sub> values for each of the transporters. A similar means of relating *in vitro* cytochrome p450 (CYP) metabolism data to *in vivo* exposure has been described (Bjornsson *et al.*, 2003). These calculations can be found in Table 1, and the concept is first introduced visually in Figure 4, where the C<sub>ss</sub>/BSEP IC<sub>50</sub> ratio is compared with the BSEP IC<sub>50</sub> value alone. Of the compounds with a C<sub>ss</sub>/BSEP IC<sub>50</sub> ratio ≥ 0.1, 95% of them are associated with some incidence of liver injury in humans. In contrast, only 49% of

the compounds with a ratio < 0.1 have evidence of liver injury. Further, if a BSEP IC<sub>50</sub> cutoff value of 25 μM was to be used in the absence of exposure, 55 of 70 (79%) annotated compounds were associated with some level of DILI. This suggests that factoring for exposure does improve the prediction of liver injury outcome based on *in vitro* BSEP inhibition data. And, the use of total drug is recommended as an additional safety factor to account for the possibility of accumulation in the liver. An example of this is provided with AMG 009 (Fig. 5), where approximately 24 h postdose, the liver concentration is approximately 27-fold higher than in plasma (Fig. 6). The AUC for AMG 009 in humans where elevated transaminases were observed was 32.8 μg·h/ml (100 mg taken orally twice daily for a C<sub>ss</sub> estimate of 2.4 μM). The IC<sub>50</sub> values for AMG 009 on BSEP and MRP function were as follows: BSEP (11.5 μM), MRP2 (stimulation, followed by inhibition, no IC<sub>50</sub> generated), MRP3 (1.1 μM), and MRP4 (13.5 μM). Therefore, the C<sub>ss</sub>/IC<sub>50</sub> ratios were BSEP (0.21), MRP3 (2.2), and MRP4 (0.18). Based on total drug, the use of C<sub>ss</sub> to relate exposure data to *in vitro* potency values for AMG 009, as presented here, would have predicted an adverse outcome in humans. Table 2 summarizes the associations made between transporter interactions relative to exposure and evidence of liver injury in humans. As seen in Table 2, compounds with a transporter C<sub>ss</sub>/IC<sub>50</sub> ratio ≥ 0.1 have the strongest association with liver injury in humans (> 80%). As shown in Table 1 and Figure 3, several compounds interfere with one of more of the MRPs with little or no effect on BSEP. Annotation of the liver injury signal observed for these compounds is needed to assess the toxicological relevance of these observations.

Summarized in Table 3 are the percentage of compounds associated with some form of liver injury relative to the total number of compounds with an effect on BSEP and each of the MRPs, meeting select C<sub>ss</sub>/IC<sub>50</sub> ratios. As seen in Table 3, when the C<sub>ss</sub>/BSEP IC<sub>50</sub> ratio is < 0.1, and the corresponding MRP ratios are < 0.1 or ≥ 0.1, the percentage of compounds with evidence of liver injury varies but is never greater than 63%. In contrast, when the C<sub>ss</sub>/BSEP IC<sub>50</sub> ratio is ≥ 0.1, and the corresponding MRP ratios are < 0.1 or ≥ 0.1 (ie, has some effect on any of the MRPs), 100% of the compounds meeting these criteria have some evidence of liver injury, with the exception of MRP4 (BSEP and MRP4 C<sub>ss</sub>/IC<sub>50</sub> ≥ 0.1 has 12/13 compounds with evidence of liver injury). However, if the total number of compounds with a C<sub>ss</sub>/BSEP IC<sub>50</sub> ratio ≥ 0.1 and have some effect on MRP4 function (ie, a ratio for MRP4 of < 0.1 or ≥ 0.1), then the percentage of compounds with evidence of liver injury goes up to 96% (22/23 compounds). These are important observations as they provide evidence in support of evaluating BSEP and the MRPs to strengthen the correlation with a liver injury outcome. Another observation is with regard to the relationship between BSEP and MRP2 interference. All of the compounds that inhibit BSEP with a C<sub>ss</sub>/IC<sub>50</sub> ratio ≥ 0.1 and have some effect on MRP2 (stimulation, stimulation followed by inhibition, or inhibition alone) are associated with

**TABLE 1**  
**Transporter Potency Values,  $C_{ss}$ /BSEP  $IC_{50}$  Ratios, and Clinical Details for 121 Drugs**

| Compound Name         | Human BSEP $IC_{50}$ ( $\mu$ M) | Human MRP2 $IC_{50}$ ( $\mu$ M) | Human MRP3 $IC_{50}$ ( $\mu$ M) | Human MRP4 $IC_{50}$ ( $\mu$ M) | Pharmacology                                                                                                                        | Acute or Chronic Therapy | Primary Route of Excretion | LiverTox Database Link                                                                                                    | Known Effect(s) on Liver                                                                                                                | FW    | Clinical Dose Levels       | Route of Administration | $C_{ss}$ /BSEP Ratio |
|-----------------------|---------------------------------|---------------------------------|---------------------------------|---------------------------------|-------------------------------------------------------------------------------------------------------------------------------------|--------------------------|----------------------------|---------------------------------------------------------------------------------------------------------------------------|-----------------------------------------------------------------------------------------------------------------------------------------|-------|----------------------------|-------------------------|----------------------|
| Mycophenolate mofetil | 76                              | 133                             | 133                             | 83                              | Transplant rejection                                                                                                                | Acute                    | Urinary                    | <a href="http://livertox.nlm.nih.gov/Mycophenolate_Mofetil.htm">http://livertox.nlm.nih.gov/Mycophenolate_Mofetil.htm</a> | Known association with liver injury                                                                                                     | 433.5 | 1–1.5 g BID (PO or IV)     | PO                      | 49,945               |
| Fusidic acid          | 10.1                            | 133                             | 133                             | 133                             | Gram-positive antibiotic                                                                                                            | Acute                    | Biliary                    | Not curated                                                                                                               | Known association with liver injury; not sold within the United States                                                                  | 516.7 | 1500 mg QD (osteomyelitis) | PO                      | 26,380               |
| Ritonavir             | 1.74                            | 133                             | 11.1                            | 34                              | Protease inhibitor for HIV                                                                                                          | Chronic                  | Biliary                    | <a href="http://livertox.nlm.nih.gov/Ritonavir.htm">http://livertox.nlm.nih.gov/Ritonavir.htm</a>                         | Known association with liver injury                                                                                                     | 721.0 | 600 mg BID                 | PO                      | 19,796               |
| Pazopanib             | 10.3                            | 133                             | 133                             | 8.1                             | Oncology (multityrosine kinase inhibitor)                                                                                           | Acute/chronic            | Biliary                    | Not curated                                                                                                               | Black box warning of severe and fatal hepatotoxicity Development halted due to liver changes observed during longer term rodent studies | 437.5 | 200–800 mg QD              | PO                      | 9,588                |
| MK-571                | 3.53                            | 133                             | 9.3                             | 6                               | Inflammation (leukotriene inhibitor)                                                                                                | Information not found    | Information not found      | Not curated                                                                                                               | Development halted due to liver changes observed during longer term rodent studies                                                      | 515.1 | 75–600 mg QD               | IV                      | 5,273                |
| Mifepristone          | 2.02                            | 133                             | 133                             | 133                             | Abortifacient (progesterone and glucocorticoid receptor antagonist); uterine myomas; endometriosis; meningiomas; Cushing's syndrome | Acute/chronic            | Biliary                    | Not curated                                                                                                               | No convincing evidence of liver injury                                                                                                  | 429.6 | 600 mg QD                  | PO                      | 3,743                |
| Deferasirox           | 58.4                            | 133                             | 133                             | 36.5                            | Iron chelator                                                                                                                       | Chronic                  | Biliary                    | Not curated                                                                                                               | Black box warning of severe and fatal hepatotoxicity                                                                                    | 373.4 | 20–40 mg/kg QD             | PO                      | 2,363                |
| Pioglitazone          | 0.4                             | Stimulation                     | 133                             | 49.5                            | Diabetes (PPAR $\gamma$ )                                                                                                           | Chronic                  | Biliary                    | <a href="http://livertox.nlm.nih.gov/Pioglitazone.htm">http://livertox.nlm.nih.gov/Pioglitazone.htm</a>                   | Known association with liver injury; liver monitoring recommended                                                                       | 356.4 | 15–60 mg QD                | PO                      | 2,338                |

TABLE 1—Continued

| Compound Name          | Human BSEP IC <sub>50</sub> (μM) | Human MRP2 IC <sub>50</sub> (μM) | Human MRP3 IC <sub>50</sub> (μM) | Human MRP4 IC <sub>50</sub> (μM) | Pharmacology                                                         | Acute or Chronic Therapy | Primary Route of Excretion | LiverTox Database Link                                                                                    | Known Effect(s) on Liver                                                      | FW     | Clinical Dose Levels                                              | Route of Administration | C <sub>50</sub> /BSEP Ratio |
|------------------------|----------------------------------|----------------------------------|----------------------------------|----------------------------------|----------------------------------------------------------------------|--------------------------|----------------------------|-----------------------------------------------------------------------------------------------------------|-------------------------------------------------------------------------------|--------|-------------------------------------------------------------------|-------------------------|-----------------------------|
|                        | 15.3                             | 133                              | 133                              | 133                              |                                                                      |                          |                            |                                                                                                           |                                                                               |        |                                                                   |                         |                             |
| Tolcapone              | 36.6                             | Stimulation                      | 85                               | 16.7                             | Parkinson's disease (catechol-O-methyl transferase inhibitor)        | Chronic                  | Urinary                    | <a href="http://livertox.nlm.nih.gov/Tolcapone.htm">http://livertox.nlm.nih.gov/Tolcapone.htm</a>         | Known association with liver injury                                           | 273.2  | 100–200mg TID                                                     | PO                      | 0.611                       |
| Paclitaxel (aka taxol) | 24.4                             | 133                              | 133                              | 133                              | Tubulin polymerizer                                                  | Acute/subchronic         | Biliary                    | Not curated                                                                                               | Known association with liver injury                                           | 853.9  | 135–175 mg/m <sup>2</sup> infusions for 3 or 24 h                 | IV                      | 0.605                       |
| Octreotide acetate     | 9.34                             | 133                              | 133                              | 133                              | Acromegaly, carcinoid syndrome, intestinal tumor-associated diarrhea | Chronic                  | Urinary                    | Not curated                                                                                               | Known association with liver injury                                           | 1019.3 | 50 μg BID or TID (SC or IV), 50–500 μg TID SC for Sandostatin LAR | SC                      | 0.565                       |
| Nelfinavir             | 11.8                             | 133                              | 133                              | 97                               | Protease inhibitor                                                   | Chronic                  | Biliary                    | <a href="http://livertox.nlm.nih.gov/Nelfinavir.htm">http://livertox.nlm.nih.gov/Nelfinavir.htm</a>       | Known association with liver injury                                           | 567.8  | 750mg TID or 1250mg BID                                           | PO                      | 0.549                       |
| Posaconazole           | 8.1                              | 133                              | 133                              | 133                              | Antifungal (14α-demethylase inhibitor)                               | Acute/chronic            | Biliary                    | <a href="http://livertox.nlm.nih.gov/Posaconazole.htm">http://livertox.nlm.nih.gov/Posaconazole.htm</a>   | 5%–10% elevated liver enzymes; jaundice and hepatitis appear in product label | 700.8  | 200mg (5ml) TID                                                   | PO                      | 0.544                       |
| Dicloxacillin          | 56.4                             | 133                              | 133                              | 133                              | Antibiotic for staphylococcus infection                              | Acute/chronic            | Urinary                    | <a href="http://livertox.nlm.nih.gov/Dicloxacillin.htm">http://livertox.nlm.nih.gov/Dicloxacillin.htm</a> | Known association with liver injury                                           | 491.0  | 125–500mg QID                                                     | PO                      | 0.498                       |
| Rifapentine            | 9.91                             | 16.3                             | 80.9                             | 35.9                             | Pulmonary tuberculosis (antibiotic)                                  | Chronic                  | Biliary                    | <a href="http://livertox.nlm.nih.gov/Rifapentine.htm">http://livertox.nlm.nih.gov/Rifapentine.htm</a>     | Known association with liver injury                                           | 877.0  | 600mg twice weekly, then PO down to 600mg once weekly             | PO                      | 0.474                       |
| Cyclosporine A         | 0.5                              | 14.5                             | 23                               | 133                              | Transplant rejection (immunosuppressant)                             | Acute                    | Biliary                    | <a href="http://livertox.nlm.nih.gov/Cyclosporine.htm">http://livertox.nlm.nih.gov/Cyclosporine.htm</a>   | Associated with drug-induced cholestasis                                      | 1202.6 | 20–600mg/kg                                                       | PO                      | 0.406                       |
| Lapatinib tosylate     | 6.49                             | 133                              | 133                              | 133                              | Oncology (HER2 kinase inhibitor)                                     | Acute                    | Biliary                    | <a href="http://livertox.nlm.nih.gov/Lapatinib.htm">http://livertox.nlm.nih.gov/Lapatinib.htm</a>         | Black box warning of severe and fatal hepatotoxicity                          | 581.1  | 1250mg QD                                                         | PO                      | 0.400                       |
| Lopinavir              | 17.3                             | 133                              | 21                               | 47                               | Protease inhibitor                                                   | Chronic                  | Biliary                    | <a href="http://livertox.nlm.nih.gov/Lopinavir.htm">http://livertox.nlm.nih.gov/Lopinavir.htm</a>         | Known association with liver injury                                           | 628.8  | 400–800mg QD (formulated with ritonavir, sold as Kaletra)         | PO                      | 0.381                       |
| Clofibrate             | 71                               | 133                              | 133                              | 133                              | Dyslipidemia                                                         | Chronic                  | Urinary                    | <a href="http://livertox.nlm.nih.gov/Clofibrate.htm">http://livertox.nlm.nih.gov/Clofibrate.htm</a>       | Known association with liver injury                                           | 242.7  | 2g QD                                                             | PO                      | 0.381                       |



TABLE 1—Continued

| Compound Name | Human BSEP            | Human MRP2             | Human MRP3            | Human MRP4            | Pharmacology                                                                                      | Acute or Chronic Therapy | Primary Route of Excretion | LiverTox Database Link                                                                                    | Known Effect(s) on Liver                                                           | FW    | Clinical Dose Levels                          | Route of Administration | $C_{\infty}$ /BSEP Ratio |
|---------------|-----------------------|------------------------|-----------------------|-----------------------|---------------------------------------------------------------------------------------------------|--------------------------|----------------------------|-----------------------------------------------------------------------------------------------------------|------------------------------------------------------------------------------------|-------|-----------------------------------------------|-------------------------|--------------------------|
|               | IC <sub>50</sub> (μM) | IC <sub>50</sub> (μM)  | IC <sub>50</sub> (μM) | IC <sub>50</sub> (μM) |                                                                                                   |                          |                            |                                                                                                           |                                                                                    |       |                                               |                         |                          |
| Ketoconazole  | 3.4                   | 133                    | 133                   | 69                    | Antifungal                                                                                        | Acute                    | Biliary                    | <a href="http://livertox.nlm.nih.gov/Ketoconazole.htm">http://livertox.nlm.nih.gov/Ketoconazole.htm</a>   | 10%–15% of patients show elevated liver enzymes; liver monitoring recommended      | 531.4 | 200mg QD                                      | PO                      | 0.381                    |
| Troglitazone  | 3                     | Stimulation/inhibition | 31                    | 61                    | Diabetes (PPARα and γ)                                                                            | Chronic                  | Biliary                    | <a href="http://livertox.nlm.nih.gov/Troglitazone.htm">http://livertox.nlm.nih.gov/Troglitazone.htm</a>   | Withdrawn from market due to liver injury                                          | 441.5 | 200–600mg QD                                  | PO                      | 0.313                    |
| Dipyridamole  | 4                     | 133                    | 133                   | 8.3                   | Adjunct therapy to prevent thromboembolism following heart valve replacement (platelet inhibitor) | Acute                    | Biliary                    | <a href="http://livertox.nlm.nih.gov/Dipyridamole.htm">http://livertox.nlm.nih.gov/Dipyridamole.htm</a>   | Liver enzyme elevations have been observed; no convincing evidence of liver injury | 504.6 | 75–100mg QID                                  | PO                      | 0.303                    |
| Irbesartan    | 7.31                  | Stimulation            | 21.1                  | 83.2                  | Hypertension (AT1 subtype angiotensin II antagonist)                                              | Chronic                  | Biliary                    | <a href="http://livertox.nlm.nih.gov/Irbesartan.htm">http://livertox.nlm.nih.gov/Irbesartan.htm</a>       | Cholestatic jaundice and abnormal liver function tests have been reported          | 428.5 | 150–300mg QD                                  | PO                      | 0.301                    |
| Tramilast     | 41.5                  | 133                    | 133                   | 1.0                   | Asthma (inhibits the production of interleukin-6)                                                 | Chronic                  | Information not found      | Not curated                                                                                               | Known association with liver injury                                                | 327.1 | 80–600mg QD (found in doi: 10.1002/rctm.2741) | PO                      | 0.286                    |
| Indinavir     | 21.2                  | 133                    | 83                    | 133                   | Protease inhibitor                                                                                | Chronic                  | Biliary                    | <a href="http://livertox.nlm.nih.gov/Indinavir.htm">http://livertox.nlm.nih.gov/Indinavir.htm</a>         | Known association with liver injury                                                | 613.8 | 800mg TID                                     | PO                      | 0.266                    |
| Bicalutamide  | 79.6                  | 133                    | 133                   | 133                   | Prostate carcinoma (antiandrogen)                                                                 | Chronic                  | Biliary/urinary (50/50)    | <a href="http://livertox.nlm.nih.gov/Bicalutamide.htm">http://livertox.nlm.nih.gov/Bicalutamide.htm</a>   | Known association with liver injury; liver enzyme monitoring is recommended        | 430.4 | 50mg QD                                       | PO                      | 0.263                    |
| Saquinavir    | 4.9                   | 133                    | 42                    | 59                    | Protease inhibitor for HIV                                                                        | Chronic                  | Biliary                    | <a href="http://livertox.nlm.nih.gov/Saquinavir.htm">http://livertox.nlm.nih.gov/Saquinavir.htm</a>       | Known association with liver injury                                                | 670.9 | 400–1200mg TID                                | PO                      | 0.247                    |
| Telithromycin | 5                     | 133                    | 133                   | 1.1                   | Ketolide antibiotic                                                                               | Acute                    | Biliary                    | <a href="http://livertox.nlm.nih.gov/Telithromycin.htm">http://livertox.nlm.nih.gov/Telithromycin.htm</a> | Known association with liver injury                                                | 812.0 | 400mg BID for 5–10 days                       | PO                      | 0.193                    |

TABLE 1—Continued

| Compound Name | Human BSEP IC <sub>50</sub> (μM) | Human MRP2 IC <sub>50</sub> (μM) | Human MRP3 IC <sub>50</sub> (μM) | Human MRP4 IC <sub>50</sub> (μM) | Pharmacology                                            | Acute or Chronic Therapy | Primary Route of Excretion | LiverTox Database Link                                                                                    | Known Effect(s) on Liver                                                            | FW    | Clinical Dose Levels                                   | Route of Administration | C <sub>∞</sub> /BSEP Ratio |
|---------------|----------------------------------|----------------------------------|----------------------------------|----------------------------------|---------------------------------------------------------|--------------------------|----------------------------|-----------------------------------------------------------------------------------------------------------|-------------------------------------------------------------------------------------|-------|--------------------------------------------------------|-------------------------|----------------------------|
|               | 25.1                             | 133                              | 133                              | 133                              |                                                         |                          |                            |                                                                                                           |                                                                                     |       |                                                        |                         |                            |
| Imatinib      |                                  |                                  |                                  |                                  | Oncology (tyrosine kinase inhibitor)                    | Acute/chronic            | Biliary                    | <a href="http://livertox.nlm.nih.gov/Imatinib.htm">http://livertox.nlm.nih.gov/Imatinib.htm</a>           | 3%–6% have severe ALT/AST or bilirubin elevations; liver monitoring recommended     | 493.6 | 400–600 mg QD                                          | PO                      | 0.176                      |
| Docetaxel     | 41                               | 133                              | 133                              | 133                              | Antimitotic (tubulin polymerizer)                       | Acute                    | Biliary                    | Not curated                                                                                               | Known association with liver injury                                                 | 807.9 | 60–100 mg/m <sup>2</sup> infusion 1 h IV every 3 weeks | PO                      | 0.160                      |
| Sitaxsentan   | 12.6                             | Stimulation/inhibition           | 45.4                             | 28.4                             | Pulmonary arterial hypertension (endothelin antagonist) | Chronic                  | Biliary/urinary (50/50)    | Not curated                                                                                               | Withdrawn from market due to liver injury                                           | 454.9 | 100–300 mg QD                                          | PO                      | 0.158                      |
| Rifampicin    | 25.3                             | 53                               | 69                               | 41.9                             | Antibiotic                                              | Acute                    | Biliary                    | <a href="http://livertox.nlm.nih.gov/Rifampin.htm">http://livertox.nlm.nih.gov/Rifampin.htm</a>           | Known association with liver injury; liver monitoring recommended for some patients | 822.9 | 150–600 mg QD                                          | IV                      | 0.147                      |
| Pranlukast    | 2.97                             | 133                              | 133                              | 2.7                              | Asthma (leukotriene inhibitor)                          | Chronic                  | Biliary                    | Not curated                                                                                               | Known association with liver injury                                                 | 481.5 | 300 QD                                                 | PO                      | 0.122                      |
| Rosiglitazone | 2.8                              | Stimulation                      | 133                              | 21                               | Diabetes (PPAR <sub>γ</sub> )                           | Chronic                  | Biliary                    | <a href="http://livertox.nlm.nih.gov/Rosiglitazone.htm">http://livertox.nlm.nih.gov/Rosiglitazone.htm</a> | Known association with liver injury; liver monitoring recommended                   | 357.4 | 2–8 mg QD                                              | PO                      | 0.119                      |
| Benzbromarone | 17.5                             | 41.6                             | 133                              | 17                               | Antigout (uricosuric)                                   | Chronic                  | Biliary                    | <a href="http://livertox.nlm.nih.gov/Benzbromarone.htm">http://livertox.nlm.nih.gov/Benzbromarone.htm</a> | Known association with liver injury; withdrawn from market in 2003                  | 421.9 | 100–200 mg QD                                          | PO                      | 0.107                      |
| Nefazodone    | 6.11                             | 133                              | 133                              | 17                               | Antidepressant (5-HT receptor antagonist)               | Chronic                  | Urinary                    | Not curated                                                                                               | Known association with liver injury; sales discontinued in Canada in 2003           | 470.0 | 300–600 mg QD                                          | PO                      | 0.099                      |

TABLE 1—Continued

| Compound Name         | Human BSEP IC <sub>50</sub> (μM) | Human MRP2 IC <sub>50</sub> (μM) | Human MRP3 IC <sub>50</sub> (μM) | Human MRP4 IC <sub>50</sub> (μM) | Pharmacology                                                   | Acute or Chronic Therapy | Primary Route of Excretion | LiverTox Database Link                                                                                                                  | Known Effect(s) on Liver                                                           | FW    | Clinical Dose Levels          | Route of Administration | C <sub>∞</sub> /BSEP Ratio |
|-----------------------|----------------------------------|----------------------------------|----------------------------------|----------------------------------|----------------------------------------------------------------|--------------------------|----------------------------|-----------------------------------------------------------------------------------------------------------------------------------------|------------------------------------------------------------------------------------|-------|-------------------------------|-------------------------|----------------------------|
| Amprrenavir           | 44.8                             | 133                              | 133                              | 133                              | HIV (protease inhibitor)                                       | Chronic                  | Biliary                    | <a href="http://livertox.nlm.nih.gov/Amprenavir_and_Fosamprenavir.htm">http://livertox.nlm.nih.gov/Amprenavir_and_Fosamprenavir.htm</a> | Known association with liver injury; liver enzyme monitoring is recommended        | 505.6 | 1200 mg BID up to 2800 mg/day | PO                      | 0.097                      |
| Praziquantel          | 67.1                             | 133                              | 133                              | 133                              | Schistosomiasis and liver fluke infection                      | Acute                    | Urinary                    | <a href="http://livertox.nlm.nih.gov/Praziquantel.htm">http://livertox.nlm.nih.gov/Praziquantel.htm</a>                                 | No convincing evidence of liver injury                                             | 312.4 | 20–25 mg/kg TID               | PO                      | 0.094                      |
| Megestrol acetate     | 17.8                             | 133                              | 133                              | 133                              | Oncology (progesterone derivative)                             | Chronic                  | Urinary                    | Not curated                                                                                                                             | No convincing evidence of liver injury                                             | 384.5 | 400–800 mg QD                 | PO                      | 0.084                      |
| Olmesartan medoxomil  | 4.73                             | Stimulation                      | 2                                | 28.5                             | Hypertension (ATI subtype angiotensin II antagonist)           | Chronic                  | Biliary/urinary (50/50)    | <a href="http://livertox.nlm.nih.gov/Olmesartan.htm">http://livertox.nlm.nih.gov/Olmesartan.htm</a>                                     | No convincing evidence of liver injury                                             | 558.6 | 20–40 mg QD                   | PO                      | 0.081                      |
| Bosentan              | 23                               | Stimulation/inhibition           | 42                               | 22                               | Pulmonary arterial hypertension (endothelin antagonist)        | Chronic                  | Biliary                    | Not curated                                                                                                                             | Associated with drug-induced cholestasis                                           | 551.6 | 62.5–125 mg BID               | PO                      | 0.059                      |
| Tolvaptan             | 9.99                             | 133                              | 133                              | 133                              | Hypervolemic hyponatremia (vasopressin V2-receptor antagonist) | Acute                    | Biliary                    | Not curated                                                                                                                             | No convincing evidence of liver injury                                             | 448.9 | 15–60 mg QD                   | PO                      | 0.040                      |
| Isotretinoin          | 37.1                             | 133                              | 133                              | 133.0                            | Acne (retinoid)                                                | Acute/chronic            | Biliary/urinary (50/50)    | <a href="http://livertox.nlm.nih.gov/Isotretinoin.htm">http://livertox.nlm.nih.gov/Isotretinoin.htm</a>                                 | Liver enzyme elevations have been observed, no convincing evidence of liver injury | 300.2 | 0.5–2 mg/kg QD                | PO                      | 0.037                      |
| Cisapride monohydrate | 22                               | 133                              | 133                              | 133                              | Gastroesophageal reflux disease (serotonin agonist)            | Chronic                  | Biliary/urinary (50/50)    | Not curated                                                                                                                             | No convincing evidence of liver injury; associated with cardiovascular toxicity    | 466.0 | 10–20 mg QID                  | PO                      | 0.036                      |
| Rabeprazole sodium    | 33.9                             | 133                              | 133                              | 133                              | Acid reflux (proton pump inhibitor)                            | Acute/chronic            | Urinary                    | Not curated                                                                                                                             | No convincing evidence of liver injury                                             | 359.4 | 20–100 mg QD or 60 mg BID     | PO                      | 0.036                      |

TABLE 1—Continued

| Compound Name | Human BSEP IC <sub>50</sub> (μM) | Human MRP2 IC <sub>50</sub> (μM) | Human MRP3 IC <sub>50</sub> (μM) | Human MRP4 IC <sub>50</sub> (μM) | Pharmacology                                         | Acute or Chronic Therapy | Primary Route of Excretion | LiverTox Database Link                                                                                          | Known Effect(s) on Liver                                                                                           | FW     | Clinical Dose Levels | Route of Administration | C <sub>50</sub> /BSEP Ratio |
|---------------|----------------------------------|----------------------------------|----------------------------------|----------------------------------|------------------------------------------------------|--------------------------|----------------------------|-----------------------------------------------------------------------------------------------------------------|--------------------------------------------------------------------------------------------------------------------|--------|----------------------|-------------------------|-----------------------------|
| Gliquidone    | 11.6                             | Stimulation                      | 23.85                            | 6.3                              | Diabetes (sulfonylurea)                              | Chronic                  | Biliary                    | Not curated                                                                                                     | Cholestatic jaundice and abnormal liver function tests have been reported for sulfonylurea therapies               | 527.6  | 15–120 QD            | PO                      | 0.035                       |
| Entacapone    | 55.6                             | 133                              | 35.1                             | 6.8                              | Parkinson's (catechol-O-methyltransferase inhibitor) | Chronic                  | Biliary                    | <a href="http://livertox.nlm.nih.gov/Entacapone.htm">http://livertox.nlm.nih.gov/Entacapone.htm</a>             | Liver enzyme elevations have been observed; no convincing evidence of liver injury                                 | 305.3  | 200mg Q3h            | PO                      | 0.032                       |
| Amiodarone    | 43                               | 133                              | 133                              | 133                              | Arrhythmia                                           | Chronic                  | Biliary                    | <a href="http://livertox.nlm.nih.gov/Amitodarone.htm">http://livertox.nlm.nih.gov/Amitodarone.htm</a>           | Black box warning of severe and fatal hepatotoxicity                                                               | 645.3  | 200–1200mg QD        | PO                      | 0.032                       |
| Temsirolimus  | 2.69                             | 17.6                             | 71.9                             | 44                               | Oncology and immunosuppression (mTOR inhibitor)      | Chronic                  | Biliary                    | <a href="http://livertox.nlm.nih.gov/Sirolimus.htm#insert">http://livertox.nlm.nih.gov/Sirolimus.htm#insert</a> | Liver enzyme elevations have been observed; primary metabolite (sirolimus) has known association with liver injury | 1030.3 | 5–20 mg              | IV                      | 0.030                       |
| Drotaverine   | 37                               | 133                              | 133                              | 24.5                             | Antispasmodic (inhibits PDE4)                        | Acute                    | Biliary/urinary (50/50)    | Not curated                                                                                                     | No convincing evidence of liver injury                                                                             | 397.5  | 40–80mg TID          | PO                      | 0.028                       |
| Zafirlukast   | 11.1                             | 58.8                             | 133                              | 12.1                             | Asthma (leukotriene inhibitor)                       | Chronic                  | Biliary                    | <a href="http://livertox.nlm.nih.gov/Zafirlukast.htm">http://livertox.nlm.nih.gov/Zafirlukast.htm</a>           | Known association with liver injury; hepatic failure has been reported                                             | 575.7  | 10–20mg BID          | PO                      | 0.027                       |
| Indomethacin  | 42                               | Stimulation                      | 66                               | 5.8                              | NSAID                                                | Acute/chronic            | Urinary                    | <a href="http://livertox.nlm.nih.gov/Indomethacin.htm">http://livertox.nlm.nih.gov/Indomethacin.htm</a>         | Known association with liver injury                                                                                | 357.8  | 25–50mg TID          | PO                      | 0.027                       |

TABLE 1—Continued

| Compound Name        | Human BSEP IC <sub>50</sub> (μM) | Human MRP2 IC <sub>50</sub> (μM) | Human MRP3 IC <sub>50</sub> (μM) | Human MRP4 IC <sub>50</sub> (μM) | Pharmacology                                                                  | Acute or Chronic Therapy | Primary Route of Excretion | LiverTox Database Link                                                                                  | Known Effect(s) on Liver                                                           | FW    | Clinical Dose Levels   | Route of Administration | C <sub>∞</sub> /BSEP Ratio |
|----------------------|----------------------------------|----------------------------------|----------------------------------|----------------------------------|-------------------------------------------------------------------------------|--------------------------|----------------------------|---------------------------------------------------------------------------------------------------------|------------------------------------------------------------------------------------|-------|------------------------|-------------------------|----------------------------|
| Danazol              | 18.7                             | 133                              | 133                              | 133                              | Angioidema, endometriosis, and fibrocystic breast disease (synthetic steroid) | Acute/chronic            | Urinary                    | Not curated                                                                                             | Black box warning of liver injury with long-term use                               | 337.5 | 50–400mg BID           | PO                      | 0.024                      |
| Febuxostat           | 42.9                             | 133                              | 133                              | 1.9                              | Gout (xanthine oxidase inhibitor)                                             | Chronic                  | Biliary/urinary (50/50)    | <a href="http://livertox.nlm.nih.gov/">http://livertox.nlm.nih.gov/</a>                                 | Known association with liver injury                                                | 316.4 | 40–80mg QD             | PO                      | 0.024                      |
| Flupirtine           | 35.5                             | 133                              | 133                              | 133                              | Nonnarcotic analgesic                                                         | Acute/chronic            | Biliary                    | <a href="http://livertox.nlm.nih.gov/">http://livertox.nlm.nih.gov/</a>                                 | Known association with liver injury                                                | 304.1 | 100–600mg QD           | PO                      | 0.023                      |
| Epalrestat           | 36.8                             | 84.4                             | 45.8                             | 6.5                              | Secondary complications due to diabetes (aldose reductase inhibitor)          | Chronic                  | Urinary                    | Not curated                                                                                             | Liver enzyme elevations have been observed; no convincing evidence of liver injury | 319.4 | 50mg QD                | PO                      | 0.023                      |
| Cefpodoxime proxetil | 81.7                             | 133                              | 133                              | 133                              | Broad spectrum antibiotic (cephalosporin class)                               | Acute                    | Biliary                    | <a href="http://livertox.nlm.nih.gov/">http://livertox.nlm.nih.gov/</a>                                 | Associated with drug-induced cholestasis                                           | 557.6 | 100–400mg BID          | PO                      | 0.022                      |
| Glyburide            | 5                                | Stimulation                      | 33                               | 10.5                             | Diabetes (sulfonylurea)                                                       | Chronic                  | Biliary/urinary (50/50)    | <a href="http://livertox.nlm.nih.gov/">http://livertox.nlm.nih.gov/</a>                                 | Associated with drug-induced cholestasis                                           | 494.0 | 1.25–25mg QD           | PO                      | 0.022                      |
| Gefitinib            | 10.9                             | 133                              | 133                              | 4.6                              | Oncology (tyrosine kinase inhibitor)                                          | Acute/chronic            | Biliary                    | <a href="http://livertox.nlm.nih.gov/Gefitinib.htm">http://livertox.nlm.nih.gov/Gefitinib.htm</a>       | Known association with liver injury; liver monitoring recommended                  | 446.9 | 250–500mg QD           | PO                      | 0.021                      |
| Itraconazole         | 18                               | 133                              | 133                              | 133                              | Antifungal                                                                    | Acute                    | Biliary                    | <a href="http://livertox.nlm.nih.gov/Itraconazole.htm">http://livertox.nlm.nih.gov/Itraconazole.htm</a> | Known association with liver injury; liver monitoring recommended                  | 705.6 | 200mg QD for 1–2 weeks | PO                      | 0.020                      |
| Mibefradil HCL       | 43.8                             | 133                              | 133                              | 133                              | Hypertension (Ca <sup>2+</sup> channel blocker)                               | Chronic                  | Biliary                    | Not curated                                                                                             | No convincing evidence of liver injury                                             | 495.6 | 100mg QD               | PO                      | 0.017                      |

TABLE 1—Continued

| Compound Name      | Human                      | Human                      | Human                      | Human                      | Pharmacology                                                      | Acute or Chronic Therapy | Primary Route of Excretion | LiverTox Database Link                                                                                                                    | Known Effect(s) on Liver                                                                    | FW     | Clinical Dose Levels                                                                      | Route of Administration                                           | C <sub>0</sub> /BSEP Ratio |
|--------------------|----------------------------|----------------------------|----------------------------|----------------------------|-------------------------------------------------------------------|--------------------------|----------------------------|-------------------------------------------------------------------------------------------------------------------------------------------|---------------------------------------------------------------------------------------------|--------|-------------------------------------------------------------------------------------------|-------------------------------------------------------------------|----------------------------|
|                    | BSEP IC <sub>50</sub> (μM) | MRP2 IC <sub>50</sub> (μM) | MRP3 IC <sub>50</sub> (μM) | MRP4 IC <sub>50</sub> (μM) |                                                                   |                          |                            |                                                                                                                                           |                                                                                             |        |                                                                                           |                                                                   |                            |
| Losartan potassium | 8.53                       | Stimulation/inhibition     | 133                        | 34.1                       | Hypertension and diabetic nephropathy (angiotensin II antagonist) | Chronic                  | Biliary/urinary (50/50)    | <a href="http://livertox.nlm.nih.gov/Losartan.htm">http://livertox.nlm.nih.gov/Losartan.htm</a>                                           | Liver enzyme elevations have been observed; associated with acute liver injury              | 422.9  | 50–100mg QD (with 25 mg used in patients with possible depletion of intravascular volume) | PO                                                                | 0.012                      |
| Everolimus         | 2                          | 11.3                       | 84                         | 95                         | Oncology and transplant rejection (mTOR inhibitor)                | Chronic                  | Biliary                    | <a href="http://livertox.nlm.nih.gov/Sirolimus.htm#insert">http://livertox.nlm.nih.gov/Sirolimus.htm#insert</a>                           | Liver enzyme elevations have been observed; known association with cholestatic liver injury | 958.2  | 2.5–20 mg QD                                                                              | PO                                                                | 0.012                      |
| Cetrorelix acetate | 1.47                       | 133                        | 133                        | 133                        | Ovulation inducer (GnRH antagonist)                               | Acute                    | Biliary                    | Not curated                                                                                                                               | Liver injury elevations up to 3x ULN have been reported                                     | 1431.1 | 0.25 mg QD (SC) or a single 3 mg dose (SC) during early luteal phase                      | SC                                                                | 0.011                      |
| Glimepiride        | 15.7                       | Stimulation                | 6.39                       | 64                         | Diabetes (sulfonylurea)                                           | Chronic                  | Urinary                    | <a href="http://livertox.nlm.nih.gov/SecondGenerationSulfonylureas.htm">http://livertox.nlm.nih.gov/SecondGenerationSulfonylureas.htm</a> | Associated with drug-induced cholestasis                                                    | 490.6  | 1–4 mg QD                                                                                 | PO                                                                | 0.009                      |
| Clofazimine        | 12.9                       | 10.4                       | 21                         | 44.5                       | Anti- <i>Mycobacterium leprae</i> (lepromatous leprosy)           | Acute/chronic            | Biliary                    | Not curated                                                                                                                               | No convincing evidence for liver injury; liver enzyme elevations have been observed         | 473.4  | 100–300 mg QD                                                                             | PO                                                                | 0.007                      |
| Acitretin          | 38.2                       | Stimulation/inhibition     | 133                        | 49.00                      | Psoriasis (retinoid)                                              | Subchronic               | Biliary/urinary (50/50)    | <a href="http://livertox.nlm.nih.gov/Actitretin.htm">http://livertox.nlm.nih.gov/Actitretin.htm</a>                                       | Black box warning of severe hepatotoxicity; liver enzyme monitoring recommended             | 326.4  | 25–50 mg QD                                                                               | PO                                                                | 0.007                      |
| Drospirenone       | 16.4                       | Stimulation/inhibition     | 133                        | 37.9                       | Birth control (synthetic hormone)                                 | Chronic                  | Biliary/urinary (50/50)    | Not curated                                                                                                                               | No convincing evidence of liver injury                                                      | 366.5  | 3 mg QD                                                                                   | PO (AUC estimated from a range of values listed in Pharmapendium) | 0.006                      |

TABLE 1—Continued

| Compound Name | Human BSEP IC <sub>50</sub> (μM) | Human MRP2 IC <sub>50</sub> (μM) | Human MRP3 IC <sub>50</sub> (μM) | Human MRP4 IC <sub>50</sub> (μM) | Pharmacology                                                          | Acute/Chronic Therapy | Acute or Chronic | Primary Route of Excretion | LiverTox Database Link                                                                                | Known Effect(s) on Liver                                                                                 | FW    | Clinical Dose Levels                                                          | Route of Administration   | C <sub>∞</sub> /BSEP Ratio |
|---------------|----------------------------------|----------------------------------|----------------------------------|----------------------------------|-----------------------------------------------------------------------|-----------------------|------------------|----------------------------|-------------------------------------------------------------------------------------------------------|----------------------------------------------------------------------------------------------------------|-------|-------------------------------------------------------------------------------|---------------------------|----------------------------|
| Valrubicin    | 24.1                             | 64                               | 76.3                             | 36.8                             | Oncology (topoisomerase inhibitor)                                    | Acute/subchronic      | Acute/Chronic    | Urinary                    | Not curated                                                                                           | No convincing evidence of liver injury; limited systemic exposure due to typical route of administration | 723.7 | 800mg once per week for 6 weeks                                               | Intravesical instillation | 0.005                      |
| Donepezil     | 78                               | 133                              | 133                              | 72.9                             | Alzheimer's (acetylcholinesterase inhibitor)                          | Chronic               | Chronic          | Urinary                    | <a href="http://livertox.nlm.nih.gov/Nonepezi.htm">http://livertox.nlm.nih.gov/Nonepezi.htm</a>       | No convincing evidence of liver injury                                                                   | 379.5 | 5–10 mg                                                                       | PO                        | 0.005                      |
| Omeprazole    | 99                               | 133                              | 133                              | 133                              | Ulcers, GERD, and Zollinger-Ellison syndrome (proton pump inhibitor)  | Chronic               | Chronic          | Urinary                    | <a href="http://livertox.nlm.nih.gov/Omeprazole.htm">http://livertox.nlm.nih.gov/Omeprazole.htm</a>   | Known association with liver injury; liver enzyme elevations have been observed                          | 345.4 | 20–40mg QD (delayed release capsules or IV)                                   | IV                        | 0.005                      |
| Dasatinib     | 13.1                             | 133                              | 133                              | 27.3                             | Oncology (multikinase inhibitor)                                      | Chronic               | Chronic          | Biliary                    | Not curated                                                                                           | Known association with liver injury                                                                      | 488.0 | 70–90mg BID (chronic phase CML) or 100mg BID (advanced phase CML and Ph+ ALL) | PO                        | 0.004                      |
| Nicardipine   | 7.87                             | 133                              | 133                              | 88                               | Hypertension (Ca <sup>2+</sup> channel blocker)                       | Chronic               | Chronic          | Biliary/urinary (50/50)    | <a href="http://livertox.nlm.nih.gov/Nicardipine.htm">http://livertox.nlm.nih.gov/Nicardipine.htm</a> | No convincing evidence of liver injury                                                                   | 515.2 | 60–120mg QD                                                                   | PO                        | 0.004                      |
| Rifabutin     | 26.7                             | 49.8                             | 133                              | 15.9                             | Antimycobacterial (inhibits DNA-dependent RNA polymerase in bacteria) | Acute                 | Acute            | Urinary                    | <a href="http://livertox.nlm.nih.gov/Rifabutin.htm">http://livertox.nlm.nih.gov/Rifabutin.htm</a>     | Known association with liver injury                                                                      | 847.0 | 300–900mg QD                                                                  | PO                        | 0.004                      |
| Telmisartan   | 16.2                             | 133                              | 60                               | 36                               | Hypertension (angiotensin II antagonist)                              | Chronic               | Chronic          | Biliary                    | <a href="http://livertox.nlm.nih.gov/Telmisartan.htm">http://livertox.nlm.nih.gov/Telmisartan.htm</a> | No convincing evidence for liver injury                                                                  | 514.6 | 20–80mg QD                                                                    | PO                        | 0.009                      |
| Ezetimibe     | 56                               | 133                              | 133                              | 133                              | Hypercholesterolemia (NPC1 inhibitor)                                 | Chronic               | Chronic          | Biliary                    | <a href="http://livertox.nlm.nih.gov/Ezetimibe.htm">http://livertox.nlm.nih.gov/Ezetimibe.htm</a>     | Liver enzyme elevations have been observed; associated with acute liver injury                           | 409.4 | 10 mg                                                                         | PO                        | 0.002                      |
| Nifedipine    | 64                               | 133                              | 133                              | 16.6                             | Hypertension (Ca <sup>2+</sup> channel blocker)                       | Chronic               | Chronic          | Urinary                    | <a href="http://livertox.nlm.nih.gov/Nifedipine.htm">http://livertox.nlm.nih.gov/Nifedipine.htm</a>   | Known association with liver injury                                                                      | 346.3 | 30–60mg QD                                                                    | PO                        | 0.002                      |

TABLE 1—Continued

| Compound Name            | Human BSEP IC <sub>50</sub> (μM) | Human MRP2 IC <sub>50</sub> (μM) | Human MRP3 IC <sub>50</sub> (μM) | Human MRP4 IC <sub>50</sub> (μM) | Pharmacology                                                                             | Acute or Chronic Therapy | Primary Route of Excretion | LiverTox Database Link                                                                                  | Known Effect(s) on Liver                                                             | FW    | Clinical Dose Levels                                                                                 | Route of Administration | C <sub>50</sub> /BSEP Ratio |
|--------------------------|----------------------------------|----------------------------------|----------------------------------|----------------------------------|------------------------------------------------------------------------------------------|--------------------------|----------------------------|---------------------------------------------------------------------------------------------------------|--------------------------------------------------------------------------------------|-------|------------------------------------------------------------------------------------------------------|-------------------------|-----------------------------|
|                          | 32.7                             | 133                              | 133                              | 133                              |                                                                                          |                          |                            |                                                                                                         |                                                                                      |       |                                                                                                      |                         |                             |
| Primaquine               | 32.7                             | 133                              | 133                              | 133                              | Antiprotozoal (vivax malaria)                                                            | Acute                    | Biliary                    | <a href="http://livertox.nlm.nih.gov/">http://livertox.nlm.nih.gov/</a>                                 | No convincing evidence of liver injury                                               | 259.3 | 15 mg QD for 14 days                                                                                 | PO                      | 0.002                       |
| Dronedaron hydrochloride | 73.9                             | 133                              | 133                              | 133                              | Cardiac arrhythmia (multichannel blocker)                                                | Chronic                  | Biliary                    | <a href="http://livertox.nlm.nih.gov/Primaquine.htm">Primaquine.htm</a><br>Not curated                  | Known association with liver injury                                                  | 556.8 | 400 mg BID                                                                                           | PO                      | 0.002                       |
| Fluvastatin              | 36.1                             | Stimulation                      | 57                               | 133                              | Hyperlipidemia (HMG-CoA reductase inhibitor)                                             | Chronic                  | Biliary                    | <a href="http://livertox.nlm.nih.gov/Fluvastatin.htm">http://livertox.nlm.nih.gov/Fluvastatin.htm</a>   | Known association with liver injury; liver monitoring recommended for some patients  | 411.5 | 20–80 mg QD                                                                                          | PO                      | 0.002                       |
| Doxazosin mesylate       | 45                               | 133                              | 133                              | 8                                | Hypertension and benign prostatic hyperplasia (alpha (A1) adrenergic receptor inhibitor) | Chronic                  | Biliary                    | <a href="http://livertox.nlm.nih.gov/Doxazosin.htm">http://livertox.nlm.nih.gov/Doxazosin.htm</a>       | Liver enzyme elevations have been observed; no convincing evidence of liver injury   | 451.5 | 1–16 mg QD or 4–8 mg QD extended-release tablets                                                     | PO                      | 0.002                       |
| Finasteride              | 28.2                             | 133                              | 133                              | 51                               | Benign prostate hyperplasia and alopecia (antiandrogen, 5α reductase inhibitor)          | Chronic                  | Biliary                    | <a href="http://livertox.nlm.nih.gov/Finasteride.htm">http://livertox.nlm.nih.gov/Finasteride.htm</a>   | No convincing evidence of liver injury                                               | 372.5 | 1 mg QD (alopecia); 5 mg QD (benign prostate hyperplasia)                                            | PO                      | 0.00147                     |
| Tacrolimus               | 7.18                             | 40.3                             | 133                              | 133                              | Transplant rejection (calcineurin inhibitor)                                             | Chronic                  | Biliary                    | <a href="http://livertox.nlm.nih.gov/Tacrolimus.htm">http://livertox.nlm.nih.gov/Tacrolimus.htm</a>     | Liver enzyme elevations have been observed; associated with drug-induced cholestasis | 804.0 | 0.01–0.05 mg/kg/day IV until patient can tolerate PO administration of 0.075 mg/kg/day to 0.26 mg/kg | PO                      | 0.001                       |
| Atorvastatin calcium     | 13                               | 133                              | 14.2                             | 88.5                             | LDL cholesterol lowering (HMG-CoA reductase inhibitor)                                   | Chronic                  | Biliary                    | <a href="http://livertox.nlm.nih.gov/Atorvastatin.htm">http://livertox.nlm.nih.gov/Atorvastatin.htm</a> | Known association with liver injury                                                  | 558.6 | 10–80 mg QD                                                                                          | PO                      | 0.001                       |
| Repaglinide              | 22                               | 72.3                             | 16.7                             | 63.9                             | Diabetes type II                                                                         | Chronic                  | Biliary                    | <a href="http://livertox.nlm.nih.gov/Repaglinide.htm">http://livertox.nlm.nih.gov/Repaglinide.htm</a>   | Cholestatic jaundice and abnormal liver function tests have been reported            | 452.6 | 0.5–4 mg BID, TID, or QID (maximum recommended daily dose is 16 mg)                                  | PO                      | 0.00075                     |



TABLE 1—Continued

| Compound Name         | Human BSEP IC <sub>50</sub> (μM) | Human MRP2 IC <sub>50</sub> (μM) | Human MRP3 IC <sub>50</sub> (μM) | Human MRP4 IC <sub>50</sub> (μM) | Pharmacology                                               | Acute or Chronic Therapy | Primary Route of Excretion | LiverTox Database Link                                                                                | Known Effect(s) on Liver                                                                                           | FW    | Clinical Dose Levels | Route of Administration | C <sub>∞</sub> /BSEP Ratio |
|-----------------------|----------------------------------|----------------------------------|----------------------------------|----------------------------------|------------------------------------------------------------|--------------------------|----------------------------|-------------------------------------------------------------------------------------------------------|--------------------------------------------------------------------------------------------------------------------|-------|----------------------|-------------------------|----------------------------|
| Adefovir dipivoxil    | 46                               | 133                              | 133                              | 133                              | Hepatitis B (reverse transcriptase inhibitor)              | Chronic                  | Urinary                    | <a href="http://livertox.nlm.nih.gov/Adefovir.htm">http://livertox.nlm.nih.gov/Adefovir.htm</a>       | No convincing evidence of liver injury; liver enzyme elevations are likely due to exacerbation of existing disease | 501.5 | 10 mg QD orally      | PO                      | 0.00069                    |
| Norethindrone acetate | 36                               | 133                              | 133                              | 133                              | Birth control (antigonadotropic)                           | Chronic                  | Information not found      | Not curated                                                                                           | PO contraceptives are associated with liver injury; but no convincing evidence for norethindrone alone             | 340.5 | 0.35 mg QD           | PO                      | 0.00057                    |
| Lovastatin            | 19.3                             | 133                              | 133                              | 133                              | Hyperlipidemia (HMG-CoA reductase inhibitor)               | Chronic                  | Biliary                    | <a href="http://livertox.nlm.nih.gov/Lovastatin.htm">http://livertox.nlm.nih.gov/Lovastatin.htm</a>   | Liver enzyme elevations have been observed; known association with cholestatic liver injury                        | 404.5 | 10–80 mg QD          | PO                      | 0.00051                    |
| Loxapine succinate    | 77                               | 133                              | 133                              | 133                              | Schizophrenia                                              | Chronic                  | Biliary                    | <a href="http://livertox.nlm.nih.gov/Loxapine.htm">http://livertox.nlm.nih.gov/Loxapine.htm</a>       | Liver enzyme elevations have been observed; associated with acute liver injury                                     | 363.1 | 60–250 mg QD         | PO                      | 0.0004                     |
| Iloperidone           | 23.4                             | 133                              | 133                              | 133                              | Antipsychotic (dopamine and serotonin receptor antagonist) | Chronic                  | Urinary                    | Not curated                                                                                           | No convincing evidence of liver injury                                                                             | 426.5 | 6–12 mg BID          | PO                      | 0.00038                    |
| Midazolam             | 41.74                            | Not tested                       | Not tested                       | Not tested                       | Benzodiazepine (CNS depressant)                            | Acute                    | Urinary                    | <a href="http://livertox.nlm.nih.gov/Midazolam.htm">http://livertox.nlm.nih.gov/Midazolam.htm</a>     | No convincing evidence of liver injury                                                                             | 325.8 | 0.01–0.04 mg/kg      | PO                      | 0.00037                    |
| Simvastatin           | 24.7                             | 133                              | 133                              | 133                              | LDL cholesterol lowering (HMG-CoA reductase inhibitor)     | Chronic                  | Biliary                    | <a href="http://livertox.nlm.nih.gov/Simvastatin.htm">http://livertox.nlm.nih.gov/Simvastatin.htm</a> | Known association with liver injury; liver monitoring recommended                                                  | 418.6 | 5–80 mg QD           | PO                      | 0.00036                    |

TABLE 1—Continued

| Compound Name               | Human BSEP IC <sub>50</sub> (μM) | Human MRP2 IC <sub>50</sub> (μM) | Human MRP3 IC <sub>50</sub> (μM) | Human MRP4 IC <sub>50</sub> (μM) | Pharmacology                                                       | Acute or Chronic Therapy | Primary Route of Excretion | LiverTox Database Link                                                                                | Known Effect(s) on Liver                                                           | FW    | Clinical Dose Levels                                                              | Route of Administration | C <sub>∞</sub> /BSEP Ratio |
|-----------------------------|----------------------------------|----------------------------------|----------------------------------|----------------------------------|--------------------------------------------------------------------|--------------------------|----------------------------|-------------------------------------------------------------------------------------------------------|------------------------------------------------------------------------------------|-------|-----------------------------------------------------------------------------------|-------------------------|----------------------------|
|                             | 28                               | 133                              | 133                              | 133                              |                                                                    |                          |                            |                                                                                                       |                                                                                    |       |                                                                                   |                         |                            |
| Isradipine                  |                                  |                                  |                                  |                                  | Hypertension (Ca <sup>++</sup> channel blocker)                    | Chronic                  | Urinary                    | <a href="http://livertox.nlm.nih.gov/Isradipine.htm">http://livertox.nlm.nih.gov/Isradipine.htm</a>   | Liver enzyme elevations have been observed; no convincing evidence of liver injury | 371.1 | 2.5–20 mg QD                                                                      | PO                      | 0.0003                     |
| Primecrolimus               | 10                               | 133                              | 133                              | 133                              | Dermatitis (inhibits T-cell activation)                            | Acute/subchronic         | Biliary                    | Not curated                                                                                           | No convincing evidence of liver injury                                             | 810.5 | 1% cream BID                                                                      | Topical                 | 0.00019                    |
| Nisoldipine                 | 33                               | 133                              | 133                              | 16.5                             | Hypertension (Ca <sup>++</sup> channel blocker)                    | Chronic                  | Biliary                    | <a href="http://livertox.nlm.nih.gov/Nisoldipine.htm">http://livertox.nlm.nih.gov/Nisoldipine.htm</a> | No convincing evidence of liver injury                                             | 388.4 | 20–60 mg QD                                                                       | PO                      | 0.00017                    |
| Latanoprost                 | 12.9                             | 133                              | 133                              | 133                              | Glaucoma and ocular hypertension (prostaglandin FP agonist)        | Chronic                  | Urinary                    | Not curated                                                                                           | No convincing evidence of liver injury                                             | 432.6 | 1 drop (1.5 μg) QD                                                                | Intraocular             | 0.00015                    |
| Dutasteride                 | 29.8                             | 133                              | 133                              | 133                              | Benign prostatic hyperplasia (5-alpha reductase inhibitor)         | Chronic                  | Biliary                    | <a href="http://livertox.nlm.nih.gov/Dutasteride.htm">http://livertox.nlm.nih.gov/Dutasteride.htm</a> | Liver enzyme elevations have been observed; no convincing evidence of liver injury | 528.5 | 0.5 mg QD                                                                         | PO                      | 0.00011                    |
| Loratadine                  | 12                               | 133                              | 133                              | 133                              | Antiallergic (H1 histamine receptor antagonist)                    | Acute/chronic            | Biliary/urinary (50/50)    | Not curated                                                                                           | Known association with liver injury                                                | 382.9 | 10 mg QD                                                                          | PO                      | 0.00010                    |
| Reserpine                   | 8.35                             | 68.4                             | 133                              | 133                              | Antihypertensive and antipsychotic                                 | Chronic                  | Biliary                    | <a href="http://livertox.nlm.nih.gov/Reserpine.htm">http://livertox.nlm.nih.gov/Reserpine.htm</a>     | No convincing evidence for liver injury                                            | 608.7 | 0.1–1.0 mg QD (doses up to 40 mg QD have been used)                               | PO                      | 0.00007                    |
| Felodipine                  | 69.7                             | 133                              | 133                              | 133                              | Hypertension (Ca <sup>++</sup> channel blocker)                    | Chronic                  | Urinary                    | <a href="http://livertox.nlm.nih.gov/Felodipine.htm">http://livertox.nlm.nih.gov/Felodipine.htm</a>   | Liver enzyme elevations have been observed; no convincing evidence of liver injury | 384.3 | 2.5–10 mg QD                                                                      | PO                      | 0.00006                    |
| Oxybutynin                  | 27.4                             | 133                              | 133                              | 133                              | Incontinence; over active bladder                                  | Chronic                  | Biliary                    | Not curated                                                                                           | No convincing evidence of liver injury                                             | 357.5 | 5–30 mg QD                                                                        | PO                      | 0.00006                    |
| Medroxyprogesterone acetate | 15.7                             | 133                              | 133                              | 22.5                             | Birth control; endometrial cancer (renal, breast, and endometrial) | Acute/chronic            | Biliary                    | <a href="http://livertox.nlm.nih.gov/Estrogens.htm">http://livertox.nlm.nih.gov/Estrogens.htm</a>     | Cholestatic jaundice and abnormal liver function tests have been observed          | 386.5 | 5–10 mg QD (PO), 400–1000 mg per week (IM), or 104 mg/0.65 ml every 3 months (SC) | PO                      | 0.00004                    |

TABLE 1—Continued

| Compound Name              | Human BSEP IC <sub>50</sub> (μM) | Human MRP2 IC <sub>50</sub> (μM) | Human MRP3 IC <sub>50</sub> (μM) | Human MRP4 IC <sub>50</sub> (μM) | Pharmacology                                                                                                       | Acute or Chronic Therapy | Primary Route of Excretion | LiverTox Database Link                                                                                          | Known Effect(s) on Liver                                                                                                                 | FW    | Clinical Dose Levels                                                  | Route of Administration | C <sub>∞</sub> /BSEP Ratio |
|----------------------------|----------------------------------|----------------------------------|----------------------------------|----------------------------------|--------------------------------------------------------------------------------------------------------------------|--------------------------|----------------------------|-----------------------------------------------------------------------------------------------------------------|------------------------------------------------------------------------------------------------------------------------------------------|-------|-----------------------------------------------------------------------|-------------------------|----------------------------|
| Astemizole                 | 58.8                             | 133                              | 133                              | 133                              | Antiallergic (H1 histamine receptor antagonist)                                                                    | Acute/chronic            | Biliary                    | Not curated                                                                                                     | No convincing evidence of liver injury                                                                                                   | 458.6 | 10 mg (serious cardiovascular events at doses as low as 20–30 mg/day) | PO                      | 0.00002                    |
| Fluphenazine hydrochloride | 87.3                             | 133                              | 133                              | 133                              | Phenothiazine antipsychotic                                                                                        | Chronic                  | Biliary                    | <a href="http://livertox.nlm.nih.gov/Fluphenazine.htm">http://livertox.nlm.nih.gov/Fluphenazine.htm</a>         | Liver enzyme elevations have been observed; associated with drug-induced cholestasis                                                     | 437.5 | 1–40 mg QD or 10 mg injection                                         | PO                      | 0.00001                    |
| Budesonide                 | 46                               | 133                              | 54.5                             | 37                               | Asthma, allergic rhinitis, and Crohn's (corticosteroid)                                                            | Chronic                  | Urinary                    | Not curated                                                                                                     | No convincing evidence of liver injury                                                                                                   | 430.5 | 9 mg QD                                                               | PO                      | 0.00001                    |
| Misoprostol                | 27.7                             | 133                              | 133                              | 46                               | Treatment of gastric ulcers, miscarriage, labor induction, and abortifacient (synthetic prostaglandin E1 analogue) | Acute                    | Urinary                    | Not curated                                                                                                     | No convincing evidence of liver injury as a monotherapy; coadministration of misoprostol with diclofenac is associated with liver injury | 382.5 | 0.2 mg QID                                                            | PO                      | 0.00001                    |
| Calcitriol                 | 39.7                             | 133                              | 133                              | 133                              | Hypocalcemia (vitamin D derivative)                                                                                | Chronic                  | Biliary                    | Not curated                                                                                                     | No convincing evidence of liver injury                                                                                                   | 416.6 | 0.25–0.50 μg QD or solution (1 μg/ml) QD                              | PO                      | 0.0000016                  |
| Bimatoprost                | 40.4                             | 133                              | 133                              | 133                              | Glaucoma and ocular hypertension (prostaglandin FP agonist)                                                        | Chronic                  | Urinary                    | Not curated                                                                                                     | Liver enzyme elevations have been observed; no convincing evidence of liver injury                                                       | 415.6 | 1 drop QD of 0.03% solution                                           | Intraocular             | 0.0000002                  |
| 17α-Ethinylestradiol       | 14                               | 133                              | 133                              | 133                              | Birth control (synthetic estrogen)                                                                                 | Chronic                  | Biliary/urinary (50/50)    | Not curated                                                                                                     | Associated with drug-induced cholestasis                                                                                                 | 296.2 | 0.025 mg QD                                                           | PO                      | Not calculated             |
| Chlordiazepoxide           | 44.1                             | 133                              | 133                              | 133                              | Anxiolytic (benzodiazepine)                                                                                        | Acute                    | Urinary                    | <a href="http://livertox.nlm.nih.gov/Chlordiazepoxide.htm">http://livertox.nlm.nih.gov/Chlordiazepoxide.htm</a> | Known association with liver injury                                                                                                      | 299.8 | 5–25 mg QID                                                           | PO                      | Not calculated             |

TABLE 1—Continued

| Compound Name         | Human BSEP IC <sub>50</sub> (μM) | Human MRP2 IC <sub>50</sub> (μM) | Human MRP3 IC <sub>50</sub> (μM) | Human MRP4 IC <sub>50</sub> (μM) | Pharmacology                                           | Acute or Chronic Therapy | Primary Route of Excretion | LiverTox Database Link                                                                                  | Known Effect(s) on Liver                                           | Clinical Dose Levels               | Route of Administration | C <sub>50</sub> /BSEP Ratio |
|-----------------------|----------------------------------|----------------------------------|----------------------------------|----------------------------------|--------------------------------------------------------|--------------------------|----------------------------|---------------------------------------------------------------------------------------------------------|--------------------------------------------------------------------|------------------------------------|-------------------------|-----------------------------|
| Ciglitazone           | 37.8                             | 133                              | 133                              | 133                              | Research substance (PPAR $\alpha$ agonist)             | Chronic                  | Biliary                    | Not curated                                                                                             | Never marketed                                                     | Information not found              | Information not found   | Not calculated              |
| Cinnarizine           | 15.7                             | 133                              | 133                              | 133                              | Motion sickness, antiemetic                            | Acute/chronic            | Urinary                    | Not curated                                                                                             | Associated with drug-induced cholestasis                           | 368.2 10–20mg QD                   | Information not found   | Not calculated              |
| Erythromycin estolate | 13                               | 133                              | 133                              | 68.2                             | Macrolide antibiotic                                   | Acute                    | Biliary                    | <a href="http://livertox.nlm.nih.gov/Erythromycin.htm">http://livertox.nlm.nih.gov/Erythromycin.htm</a> | Black box warning of cholestatic liver injury                      | 1055.6 400mg QID for up to 15 days | PO                      | Not calculated              |
| GDC-0941 bimesylate   | 15.2                             | 133                              | 133                              | 2.7                              | Oncology (PI3kinase inhibitor)                         | Information not found    | Information not found      | Not curated                                                                                             | Information not found                                              | 513.6 Information not found        | Information not found   | Not calculated              |
| Mevastatin            | 27                               | 133                              | 133                              | 133                              | Hyperlipidemia (HMG-CoA reductase inhibitor)           | Chronic                  | Information not found      | Information not found                                                                                   | Never marketed                                                     | 390.2 Information not found        | Information not found   | Not calculated              |
| Neratinib             | 25                               | 133                              | 133                              | 23                               | Oncology (HER2 and EGFR kinase inhibitor)              | Information not found    | Information not found      | Not curated                                                                                             | Currently undergoing clinical trials; information is minimal       | 557.0 Information not found        | Information not found   | Not calculated              |
| Rifaximin             | 42                               | 15.4                             | 65                               | 30.2                             | Antibiotic                                             | Acute                    | Biliary                    | <a href="http://livertox.nlm.nih.gov/Rifaximin.htm">http://livertox.nlm.nih.gov/Rifaximin.htm</a>       | No convincing evidence of liver injury; minimal PO bioavailability | 785.9 10–30mg/kg QD                | PO                      | Not calculated              |
| Staurosporine         | 18.7                             | 133                              | 133                              | 37.9                             | Kinase inhibitor (research substance)                  | Information not found    | Information not found      | Not curated                                                                                             | Information not found                                              | 466.5 Information not found        | Information not found   | Not calculated              |
| Valinomycin           | 1.56                             | 133                              | 133                              | 133                              | Research substance produced by streptomycetes bacteria | Information not found    | Information not found      | Not curated                                                                                             | <i>In vitro</i> BSEP interference has been shown by others         | 1111.3 Information not found       | Information not found   | Not calculated              |
| Wortmannin            | 13.6                             | 46.1                             | 133                              | 63.2                             | Kinase inhibitor (research substance)                  | Information not found    | Information not found      | Not curated                                                                                             | Information not found                                              | 428.4 Information not found        | Information not found   | Not calculated              |

Notes. A list of 109 drugs for which *in vitro* potency values are given for the BSEP and MRP assays. Additional clinical information is provided, including associations with liver injury and exposure data (area under the concentration versus time curve or AUC) in humans. A concentration at steady state or C<sub>50</sub> was derived from the AUC values by dividing by the dose interval. The resulting C<sub>50</sub> estimates were normalized relative to BSEP IC<sub>50</sub> values in an attempt to relate exposure in blood to *in vitro* potency concentrations. A supplemental data table is provided that contains all of the information captured in table 1, as well as *in vitro* transporter data for the remaining 500+ drugs.

Abbreviations: ALL, acute lymphoblastic leukemia; ALT, alanine aminotransferase; AST, aspartate aminotransferase; AT1, angiotensin II receptor, type 1; BID, twice daily; CML, chronic myelogenous leukemia; CNS, central nervous system; EGFR, epidermal growth factor receptor; GERD, gastroesophageal reflux disease; HER2, human epidermal growth factor receptor 2; HIV, human immunodeficiency virus; HMG-CoA reductase, 3-hydroxy-3-methylglutaryl-CoA reductase; LDL, low density lipoprotein; mTOR, mammalian target of rapamycin; NPC1, Niemann-Pick disease, type C1; PDE4, phosphodiesterase 4; QD, once daily; T1D, three times daily; ULN, upper limit of normal; \*\*\*s, sandostatatin LAR is the name of the drug product – I cannot find a meaning for LAR, that is just part of the name.

## Comparison of the $C_{ss}/BSEP IC_{50}$ Ratio with the BSEP $IC_{50}$ Value Alone for 109 Marketed or Withdrawn Drugs

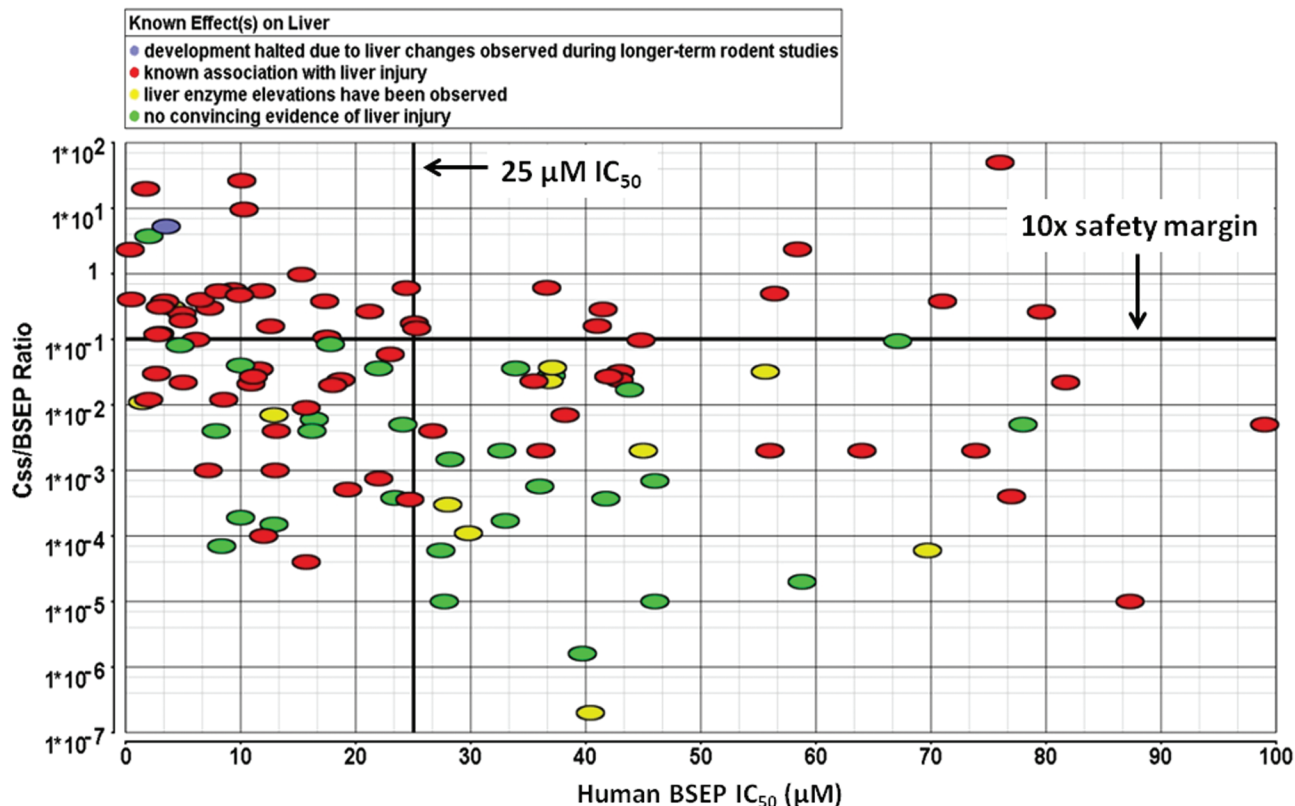

FIG. 4. Dot plot performed in Partek Discovery Suite 6.4, demonstrating how an appreciation for exposure appears to improve the correlation of liver injury in humans with *in vitro* BSEP inhibition. Abbreviation: BSEP, bile salt export pump.

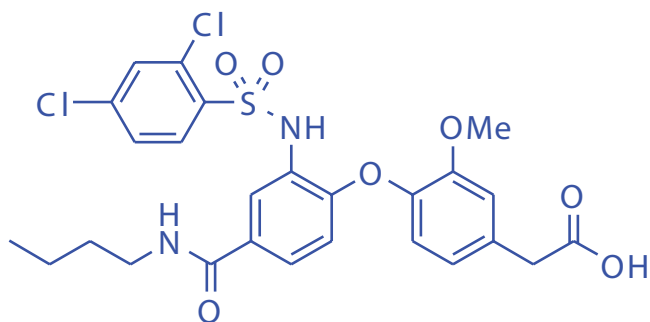

FIG. 5. Chemical structure of AMG 009 (formula weight [FW] = 581.47), a CRTH2/DP dual antagonist being developed for allergic rhinitis and asthma. Due to reversible liver enzyme elevations seen in healthy volunteers, development of this compound was halted. Preclinical models failed to predict the human outcome.

liver injury. Also listed in Table 3 are the identities of the compounds fitting each category of  $C_{ss}/IC_{50}$  ratio. In total, 24 compounds populated each of the  $C_{ss}/IC_{50}$  ratio categories shown in Table 3, and these 24 compounds represent 14 different drug targets or indications. Multiple compounds for similar targets/

indications are listed in Table 4, as well as a summary of the transporters with which they interfered, and these include the PPAR agonists, protease inhibitors, antibiotics, and endothelin antagonists.

### DISCUSSION

BSEP inhibition in humans has been implicated as a mechanism of DILI and has been described as a susceptibility factor for DILI based on studies comparing *in vitro* BSEP inhibition data with known clinical outcomes for select benchmark compounds (Dawson *et al.*, 2012; Fattinger *et al.*, 2001; Feng *et al.*, 2009; Funk *et al.*, 2001; Kostrubsky *et al.*, 2003, 2006; Morgan *et al.*, 2010). These association studies are important because neither a reliable biomarker specific for BSEP inhibition nor a toxicologically relevant preclinical model to recapitulate the BSEP-mediated liver injury seen in humans currently exists. The 3 aims of this work were to profile the effect of a large set of benchmark drugs/compounds, representing diverse pharmacological and chemical classes, in a BSEP, MRP2, MRP3, and MRP4 high-throughput *in vitro* screen, to determine if the effect of a

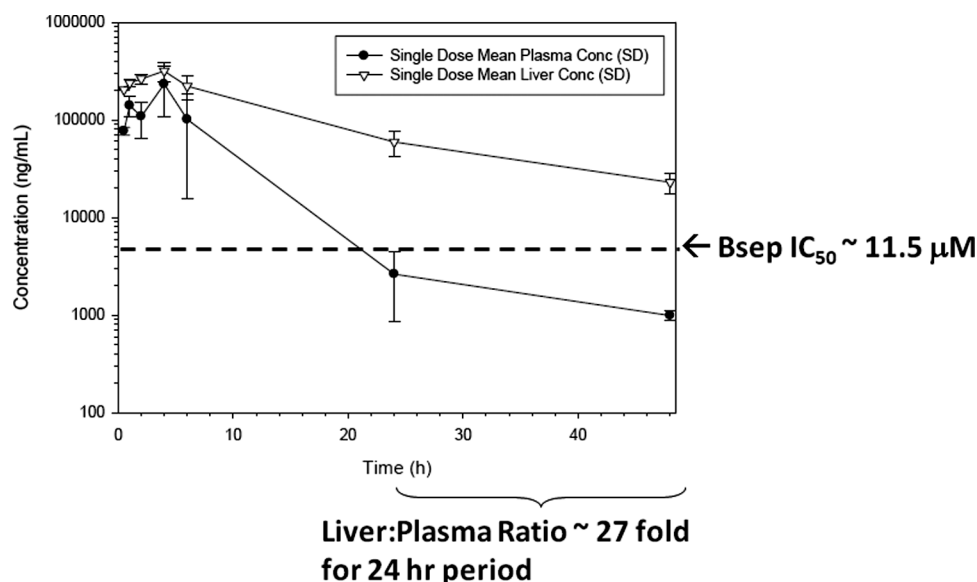

**FIG. 6.** The concentration of AMG 009 in plasma (closed circles) or liver (open triangles) over a 24h time course, following a single PO dose. Bars represent SDs. Abbreviations: BSEP, bile salt export pump; conc = concentration.

**TABLE 2**  
**Number of Compounds With Evidence of Liver Injury/Total  
Number of Compounds Fitting Column and Row Criteria (%)**

| Transporter Assay | $C_{ss}/IC_{50}$<br>Ratio < 0.01 | $C_{ss}/IC_{50}$<br>Ratio < 0.1 | $C_{ss}/IC_{50}$<br>Ratio $\geq$ 0.1 |
|-------------------|----------------------------------|---------------------------------|--------------------------------------|
| BSEP              | 18/44 (41%)                      | 34/70 (49%)                     | 36/38 (95%)                          |
| MRP2              | 6/9 (67%)                        | 9/13 (69%)                      | 1/1 (100%)                           |
| MRP3              | 7/11 (64%)                       | 17/23 (74%)                     | 5/6 (83%)                            |
| MRP4              | 10/23 (53%)                      | 26/39 (67%)                     | 14/17 (82%)                          |

*Notes.* The closer exposure values in humans approach *in vitro* potency values in the transporter assays, the stronger the association with liver injury. Conversely, as the exposure values fall further below the *in vitro* potency values, the weaker the association with liver injury.

compound on multiple transporters, including an appreciation for exposure, improved the prediction of liver injury outcome in humans, and to recommend how such a transporter panel could be used to improve therapeutic compound development. These aims also sought to solidify the position of our previous association study between BSEP inhibition and DILI (Morgan *et al.*, 2010).

As shown in Figure 3, the majority of compounds had little or no effect on the 4 transporters evaluated here. The distinct patterns of effect across the transporter panel suggest that the inhibition that is seen is not likely due to compromised membrane integrity but rather actual transporter interaction. The canalicular efflux transporter, MRP2, and the basolateral efflux transporters, MRP3 and MRP4, were selected to compliment BSEP based on their respective roles under cholestatic conditions. MRP2 manages the canalicular excretion of phase 2

conjugated BAs (eg, sulfated or glucuronidated BAs). MRP3 and MRP4, however, manage the elimination of BAs into the blood under cholestatic conditions to help mitigate BA accumulation. Therefore, we hypothesize that compounds that inhibit BSEP and one or more of these other BA transporters may be at an even greater risk of DILI. To test this hypothesis, the effect of compounds on the transporter panel was related to clinical outcomes. These comparisons are summarized in Tables 2–4 and argue that knowledge of the effect of a BSEP inhibitor on an MRP panel does improve the prediction of DILI.

These data also show that this approach cannot discriminate the incidence or severity of DILI, or the idiosyncratic hepatotoxicants from the intrinsic. For example, rosiglitazone and pioglitazone have only rare instances of liver injury, whereas bosentan is more frequent (approximately 11% of the patient population shows transaminase elevations), yet these 3 drugs interact with multiple transporters in this panel. However, the PPAR agonists may not be a good example of BSEP inhibitors and liver injury given the role played by PPAR $\alpha$  in BA homeostasis, possibly imparting protection against BA accumulation due to BSEP inhibition (Li *et al.*, 2012; Zollner *et al.*, 2006, 2010). Indeed, Li *et al.* showed that PPAR $\alpha$ -null mice fed a diet rich in cholic acid showed severe hepatotoxicity, whereas the wild-type mice fed the same diet showed no evidence of liver injury. This work demonstrates that PPAR $\alpha$  activity can ameliorate the hepatocellular accumulation of BAs. Although PPAR $\alpha$  is more abundant in liver than PPAR $\gamma$ , it is feasible that PPAR $\gamma$  activity could also participate in BA homeostasis (Rogue *et al.*, 2010). And, although rosiglitazone is a relatively pure PPAR $\gamma$  agonist, pioglitazone and troglitazone do have some PPAR $\alpha$  activity. Nevertheless, the data set presented here indicates that other endpoints, *in vitro* or *in vivo*, need to be

**TABLE 3**  
**Number of Compounds With Evidence of Liver Injury/Total Number of Compounds Fitting Column and Row Criteria (%)**

| Transporter Assay                          | BSEP $C_{ss}/IC_{50}$ Ratio < 0.1 | BSEP $C_{ss}/IC_{50}$ Ratio $\geq$ 0.1 | Compounds With BSEP $C_{ss}/IC_{50}$ Ratio $\geq$ 0.1                                                                                                                                   |
|--------------------------------------------|-----------------------------------|----------------------------------------|-----------------------------------------------------------------------------------------------------------------------------------------------------------------------------------------|
| MRP2 stimulation or stimulation/inhibition | 8/10 (80%)                        | 6/6 (100%)                             | Sitaxsentan, irbesartan, tolcapone, rosiglitazone, pioglitazone, troglitazone                                                                                                           |
| MRP2 $C_{ss}/IC_{50}$ ratio < 0.1          | 6/10 (60%)                        | 3/3 (100%)                             | Benzbromarone, rifampicin, cyclosporine A                                                                                                                                               |
| MRP2 $C_{ss}/IC_{50}$ ratio $\geq$ 0.1     | None found                        | 1/1 (100%)                             | Rifapentine                                                                                                                                                                             |
| MRP3 $C_{ss}/IC_{50}$ ratio < 0.1          | 10/16 (63%)                       | 7/7 (100%)                             | Bosentan, rifampicin, sitaxsentan, saquinavir, indinavir, troglitazone, rifapentine                                                                                                     |
| MRP3 $C_{ss}/IC_{50}$ ratio $\geq$ 0.1     | 0/1 (0%)                          | 5/5 (100%)                             | Irbesartan, lopinavir, tolcapone, ritonavir, <sup>a</sup> MK-571                                                                                                                        |
| MRP4 $C_{ss}/IC_{50}$ ratio < 0.1          | 16/29 (55%)                       | 10/10 (100%)                           | Nefazodone, pioglitazone, rosiglitazone, troglitazone, sitaxsentan, saquinavir, irbesartan, ketoconazole, nelfinavir, <sup>a</sup> MK-571                                               |
| MRP4 $C_{ss}/IC_{50}$ ratio $\geq$ 0.1     | 2/4 (50%)                         | 12/13 (92%)                            | Benzbromarone, pranlukast, rifampicin, telithromycin, tranilast, lopinavir, rifapentine, tolcapone, deferasirox, pazopanib, ritonavir, mycophenolate mofetil, <sup>b</sup> dipyridamole |

*Notes.* A multifactorial approach to risk assessment that includes a measurement of BSEP and MRP interference, and accounts for exposure in humans, demonstrates an improved prediction of liver injury.

<sup>a</sup>MK-571 was never marketed due to liver changes observed during longer term rodent studies.

<sup>b</sup>Dipyridamole is not associated with DILI.

included to provide better fidelity as to what compounds are likely to cause blatant liver injury during clinical trials versus those that are associated with a more idiosyncratic-like DILI signal and the compounds that fall somewhere in between. Inclusion of effects to mitochondria, reactive metabolite formation, CYP inhibition, physicochemical properties, and transporter interactions, as well as several other parameters may move predictive safety efforts closer to having such resolution on the early detection of DILI. The data set and annotations provided in this work are a step in this direction, a multifactorial approach to hazard identification.

In the present work, 635 compounds were evaluated for their effect on BSEP (623 for their effect on BSEP and the MRPs), and potency values were derived via nonlinear regression and described as  $IC_{50}$  values. For translation to humans, evidence of liver injury and exposure data (AUC values) were annotated for 109 benchmark drugs that showed some effect on BSEP transport. Given that the burden to liver is usually unknown, and the potential for accumulation as described elsewhere (Feng *et al.*, 2009; Hamadeh *et al.*, 2010), and as was demonstrated with AMG 009 in this work, the use of total drug for the purpose of hazard identification would seem appropriate. However, as the methodologies for assessing intracellular free fractions evolve and become more routine, this measurement would likely provide the most accurate assessment of the amount of compound available to interact with efflux transporters.

Figure 4 shows how appreciation for exposure can improve the prediction of adverse outcome (DILI) as it relates to *in vitro* BSEP inhibition. Of the compounds with a BSEP  $IC_{50}$  value of 25  $\mu$ M, 79% of them were correctly identified as being associated with DILI. In comparison, of the compounds with a  $C_{ss}/BSEP IC_{50}$  ratio  $\geq$  0.1, 95% of them were correctly identified as having an

association with DILI. Although the use of cutoff values, such as 25  $\mu$ M in the case of BSEP, can serve its purpose in early screening strategies to triage compounds, a more accurate risk assessment will account for known or projected exposures. Also illustrated in Figure 4 are compounds with  $C_{ss}/BSEP IC_{50}$  ratios < 0.1 with some association with DILI. The lower the exposure value or  $C_{ss}$ , in these cases, the less likely BSEP inhibition is a contributing factor to the underlying mechanism of DILI, regardless of the *in vitro* potency value. Of interest, however, are the 2 compounds with a  $C_{ss}/BSEP IC_{50}$  ratio  $\geq$  0.1, but no evidence of liver injury (mifepristone and dipyridamole). In the case of mifepristone, an abortifacient, it is typically administered as a single PO dose of 200 or 600 mg. The acute nature of this dosing regimen probably explains why it is not associated with DILI despite having a  $C_{ss}/BSEP IC_{50}$  ratio > 1.0. Orally administered dipyridamole is an adjunct therapy with coumarin to prevent postoperative thromboembolic complications following cardiac valve replacement. For this indication, 75–100 mg are taken 4 times daily, according to the drug label. Although the label does refer to rare reports of liver injury, to the best of our knowledge, no convincing evidence of DILI associated with dipyridamole therapy has been published. This is a good example where the measurement of intracellular free fraction may indicate that the total drug estimate does not accurately reflect how much drug is actually interacting with BSEP and MRP4.

There are some important points to consider with regard to this data set. The membrane vesicle assay is not metabolically competent, so *in vivo* metabolism may render a compound more or less active on a given transporter, such as has been shown for troglitazone (Funk *et al.*, 2001; Masubuchi, 2006). Another consideration is that the MRP2, MRP3, and MRP4 probe substrate

**TABLE 4**  
**Compounds Affecting Multiple Transporters and Meeting the  $C_{ss}/IC_{50}$  Ratios Listed in Table 3**

|                       | Transporters Affected               | Pharmacology                             | Known Effect(s) on Liver                                                            |
|-----------------------|-------------------------------------|------------------------------------------|-------------------------------------------------------------------------------------|
| Saquinavir            | BSEP, MRP3, MRP4                    | Protease inhibitors                      | Known association with liver injury                                                 |
| Indinavir             | BSEP, MRP3                          |                                          | Known association with liver injury                                                 |
| Lopinavir             | BSEP, MRP3, MRP4                    |                                          | Known association with liver injury                                                 |
| Ritonavir             | BSEP, MRP3, MRP4                    |                                          | Known association with liver injury                                                 |
| Nelfinavir            | BSEP, MRP4                          |                                          | Known association with liver injury                                                 |
| Rifampicin            | BSEP, MRP2, MRP3, MRP4              | Antibiotics                              | Known association with liver injury; liver monitoring recommended for some patients |
| Rifapentine           | BSEP, MRP2, MRP3, MRP4              |                                          | Known association with liver injury                                                 |
| Telithromycin         | BSEP, MRP4                          |                                          | Known association with liver injury                                                 |
| Rosiglitazone         | BSEP, MRP2, MRP4                    | PPAR agonists                            | Known association with liver injury; liver monitoring recommended                   |
| Pioglitazone          | BSEP, MRP2, MRP4                    |                                          | Known association with liver injury; liver monitoring recommended                   |
| Troglitazone          | BSEP, MRP2, MRP3, MRP4              |                                          | Withdrawn from market due to liver injury                                           |
| Sitaxsentan           | BSEP, MRP2, MRP3, MRP4              | Endothelin                               | Withdrawn from market due to liver injury                                           |
| Bosentan              | BSEP, MRP3                          | antagonists                              | Associated with drug-induced cholestasis                                            |
| MK-571                | BSEP, <sup>a</sup> MRP2, MRP3, MRP4 | Leukotriene inhibitors                   | Development halted due to liver changes observed during longer term rodent studies  |
| Pranlukast            | BSEP, MRP4                          |                                          | Known association with liver injury                                                 |
| Mycophenolate mofetil | BSEP, MRP4                          | Immunosuppressants                       | Known association with liver injury                                                 |
| Cyclosporine A        | BSEP, MRP2                          |                                          | Associated with drug-induced cholestasis                                            |
| Tranilast             | BSEP, MRP4                          | Inhibits the production of interleukin-6 | Known association with liver injury                                                 |
| Irbesartan            | BSEP, MRP2, MRP3                    | Angiotensin II antagonist                | Cholestatic jaundice and abnormal liver function tests have been reported           |
| Tolcapone             | BSEP, MRP2, MRP3, MRP4              | Catechol-O-methyl transferase inhibitor  | Known association with liver injury                                                 |
| Benzbromarone         | BSEP, MRP2, MRP4                    | Uricosuric                               | Known association with liver injury; withdrawn from market in 2003                  |
| Nefazodone            | BSEP, MRP4                          | 5-HT receptor antagonist                 | Known association with liver injury; sales discontinued in Canada in 2003           |
| Deferasirox           | BSEP, MRP4                          | Iron chelator                            | Black box warning of severe and fatal hepatotoxicity                                |
| Pazopanib             | BSEP, MRP4                          | Kinase inhibitor                         | Black box warning of severe and fatal hepatotoxicity                                |
| Dipyridamole          | BSEP, MRP4                          | Platelet inhibitor                       | No convincing evidence of liver injury                                              |
| Ketoconazole          | BSEP, MRP4                          | Antifungal                               | 10–15% elevated liver enzymes; liver monitoring recommended                         |

*Notes.* A listing of the drugs shown to affect BSEP and 1 or more of the MRPs, meeting the  $C_{ss}/IC_{50}$  ratios shown in table 3. Also detailed are the specific transporters affected and pertinent clinical information. Of the drugs listed in this table, only dipyridamole has no convincing evidence of liver injury. Although MK-571 also showed no evidence of liver injury in humans during clinical trials, trials were nonetheless halted due to liver-related findings in longer-term rodent studies.

<sup>a</sup>An  $IC_{50}$  value for MK-571 could not be generated in the MRP2 assay as presented here due to insufficient effect; however, the literature cites MK-571 as an MRP2 inhibitor.

was an estradiol derivative and not a BA. We attempted to use radiolabeled taurocholate as the reporter substrate for MRP3 and MRP4 but were unsuccessful in achieving a large enough signal to support a screening strategy (data not shown). Based on the data presented here, there is value in knowing whether or not a compound interferes with MRP2, MRP3, and MRP4 function even though the probe substrate is not a BA. Finally, for MRP2, only  $E_217\beta G$  was evaluated, representing a substrate of MRP2 that has 2 or more binding sites (Gerk *et al.*, 2004). A single binding site probe substrate, such as the LTC<sub>4</sub> or fluoroprobe 5(6)-carboxy-2',7'-dichlorofluorescein (CDCF) may provide a different dimension to the understanding of MRP2 interactions. For example, others have shown stimulation of  $E_217\beta G$  transport across MRP2 with indomethacin, but inhibition of CDCF transport (Heredi-Szabo *et al.*, 2008).

In summary, relating  $IC_{50}$  values to *in vivo* exposure appears to improve the correlation of BSEP inhibition to liver injury in humans. And, knowledge of the effect of a BSEP inhibitor on MRP2, MRP3, and MRP4 improves the correlation with liver injury relative to BSEP inhibition alone. As a screening strategy, it is recommended that BSEP be the first tier through which compounds are triaged, choosing the ones with as little effect on BSEP as possible, and without detriment to pharmacology, pharmacokinetics, or other toxicity endpoints. If a BSEP inhibitor is to be advanced, it is recommended that effects to MRP2, MRP3, and MRP4 be evaluated, and that one relates these effects to known or projected exposures in humans. As shown here, this practice was associated with close to a 100% correct prediction of DILI. A recommended flow scheme for deploying this transporter panel is illustrated in Figure 7. The data set and annotations



## Transporter Panel Flow Scheme for Hazard Identification

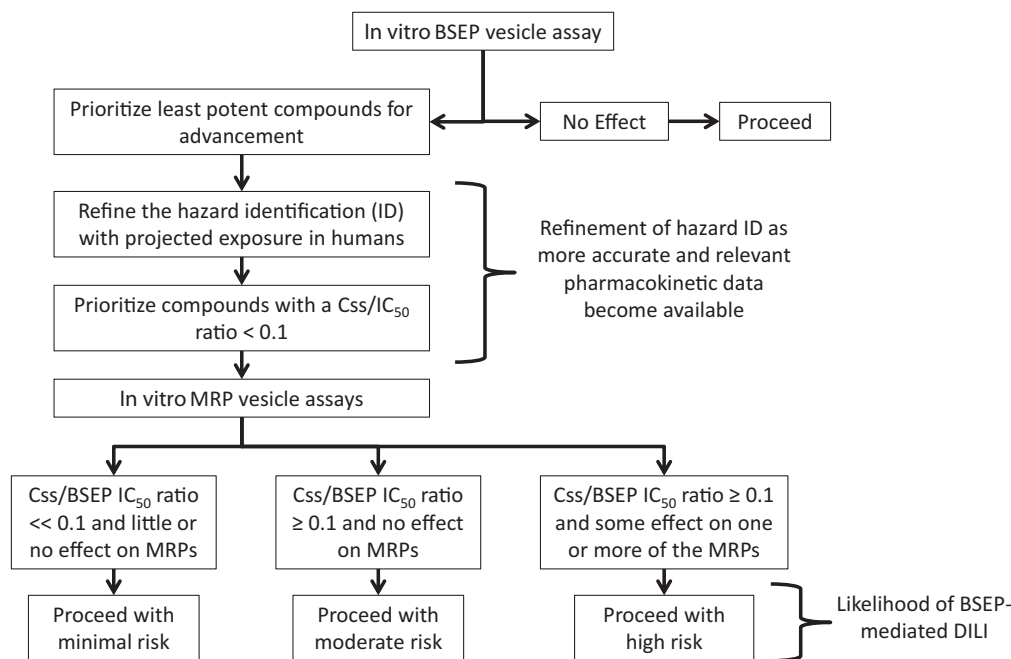

**FIG. 7.** Flow scheme for deploying a transporter panel during early therapeutic compound development. Abbreviations: BSEP, bile salt export pump; DILI, Drug-induced liver injury; MRP, multidrug resistance-associated protein.

provided here should prove useful in relating the effect of drug candidates in this type of transporter panel to the effect profile of marketed or withdrawn drugs. If the drug candidate has a similar profile to compounds with known associations with liver injury, with consideration of exposure, then this would suggest the drug candidate may have a similar outcome in humans. Finally, until a BSEP/Bsep-specific biomarker is identified, and/or a preclinical animal model that recapitulates the postulated BSEP-mediated liver injury seen in humans, association studies such as the one provided here are the best available tools for preventing or limiting unforeseen DILI via this mechanism.

### SUPPLEMENTARY DATA

Supplementary data are available online at <http://toxsci.oxfordjournals.org/>.

### REFERENCES

- Amacher, D. E. (2012). The primary role of hepatic metabolism in idiosyncratic drug-induced liver injury. *Expert Opin. Drug Metab. Toxicol.* **8**, 335–347.
- Bjornsson, T. D., Callaghan, J. T., Einolf, H. J., Fischer, V., Gan, L., Grimm, S., Kao, J., King, S. P., Miwa, G., Ni, L., *et al.* (2003). The conduct of in vitro and in vivo drug-drug interaction studies: A PhRMA perspective. *J. Clin. Pharmacol.* **43**, 443–469.
- Corsini, A., Ganey, P., Ju, C., Kaplowitz, N., Pessayre, D., Roth, R., Watkins, P. B., Albassam, M., Liu, B., Stancic, S., *et al.* (2012). Current challenges and controversies in drug-induced liver injury. *Drug Saf.* **35**, 1099–1117.
- Daly, A. K. (2010). Drug-induced liver injury: Past, present and future. *Pharmacogenomics* **11**, 607–611.
- Dawson, S., Stahl, S., Paul, N., Barber, J., and Kenna, J. G. (2012). In vitro inhibition of the bile salt export pump correlates with risk of cholestatic drug-induced liver injury in humans. *Drug Metab. Dispos.* **40**, 130–138.
- Fattinger, K., Funk, C., Pantze, M., Weber, C., Reichen, J., Stieger, B., and Meier, P. J. (2001). The endothelin antagonist bosentan inhibits the canalicular bile salt export pump: A potential mechanism for hepatic adverse reactions. *Clin. Pharmacol. Ther.* **69**, 223–231.
- Feng, B., Xu, J. J., Bi, Y. A., Mireles, R., Davidson, R., Duignan, D. B., Campbell, S., Kostrubsky, V. E., Dunn, M. C., Smith, A. R., *et al.* (2009). Role of hepatic transporters in the disposition and hepatotoxicity of a HER2 tyrosine kinase inhibitor CP-724,714. *Toxicol. Sci.* **108**, 492–500.
- Funk, C., Ponelle, C., Scheuermann, G., and Pantze, M. (2001). Cholestatic potential of troglitazone as a possible factor contributing to troglitazone-induced hepatotoxicity: In vivo and in vitro interaction at the canalicular bile salt export pump (Bsep) in the rat. *Mol. Pharmacol.* **59**, 627–635.
- Gerk, P. M., Li, W., and Vore, M. (2004). Estradiol 3-glucuronide is transported by the multidrug resistance-associated protein 2 but does not activate the allosteric site bound by estradiol 17-glucuronide. *Drug Metab. Dispos.* **32**, 1139–1145.
- Hamadeh, H. K., Todd, M., Healy, L., Meyer, J. T., Kwok, A. M., Higgins, M., and Afshari, C. A. (2010). Application of genomics for identification of systemic toxicity triggers associated with VEGF-R inhibitors. *Chem. Res. Toxicol.* **23**, 1025–1033.
- Heredi-Szabo, K., Kis, E., Molnar, E., Gyorfi, A., and Krajcsi, P. (2008). Characterization of 5(6)-carboxy-2',7'-dichlorofluorescein transport by MRP2 and utilization of this substrate as a fluorescent surrogate for LTC4. *J. Biomol. Screen.* **13**, 295–301.
- Kepler, D. (2011a). Cholestasis and the role of basolateral efflux pumps. *Z. Gastroenterol.* **49**, 1553–1557.

- Kepler, D. (2011b). Multidrug resistance proteins (MRPs, ABCs): Importance for pathophysiology and drug therapy. *Handbook Exp. Pharmacol.* **201**, 299–323. doi:10.1007/978-3-642-14541-4\_8
- Kostrubsky, S. E., Strom, S. C., Kalgutkar, A. S., Kulkarni, S., Atherton, J., Mireles, R., Feng, B., Kubik, R., Hanson, J., Urda, E., *et al.* (2006). Inhibition of hepatobiliary transport as a predictive method for clinical hepatotoxicity of nefazodone. *Toxicol. Sci.* **90**, 451–459.
- Kostrubsky, V. E., Strom, S. C., Hanson, J., Urda, E., Rose, K., Burliegh, J., Zocharski, P., Cai, H., Sinclair, J. F., and Sahi, J. (2003). Evaluation of hepatotoxic potential of drugs by inhibition of bile-acid transport in cultured primary human hepatocytes and intact rats. *Toxicol. Sci.* **76**, 220–228.
- Kubit, R., Dröge, C., Stindt, J., Weissenberger, K., and Häussinger, D. (2012). The bile salt export pump (BSEP) in health and disease. *Clin. Res. Hepatol. Gastroenterol.* **36**, 536–553.
- Letourneau, I. J., Bowers, R. J., Deeley, R. G., and Cole, S. P. (2005). Limited modulation of the transport activity of the human multidrug resistance proteins MRP1, MRP2 and MRP3 by nicotine glucuronide metabolites. *Toxicol. Lett.* **157**, 9–19.
- Li, F., Patterson, A. D., Krausz, K. W., Tanaka, N., and Gonzalez, F. J. (2012). Metabolomics reveals an essential role for peroxisome proliferator-activated receptor  $\alpha$  in bile acid homeostasis. *J. Lipid Res.* **53**, 1625–1635.
- Lundell, K., and Wikvall, K. (2008). Species-specific and age-dependent bile acid composition: Aspects on CYP8B and CYP4A subfamilies in bile acid biosynthesis. *Curr. Drug Metab.* **9**, 323–331.
- Masubuchi, Y. (2006). Metabolic and non-metabolic factors determining troglitazone hepatotoxicity: A review. *Drug Metab. Pharmacokinet.* **21**, 347–356.
- Morgan, R. E., Trauner, M., van Staden, C. J., Lee, P. H., Ramachandran, B., Eschenberg, M., Afshari, C. A., Qualls, C. W. Jr, Lightfoot-Dunn, R., and Hamadeh, H. K. (2010). Interference with bile salt export pump function is a susceptibility factor for human liver injury in drug development. *Toxicol. Sci.* **118**, 485–500.
- National Research Council (U.S.). Committee for the Update of the Guide for the Care and Use of Laboratory Animals, Institute for Laboratory Animal Research (U.S.), National Academies Press (U.S.). (2011). *Guide for the Care and Use of Laboratory Animals*, Vol. **xxv**, 220 pp. National Academies Press, Washington, DC. <http://www.ncbi.nlm.nih.gov/books/NBK54050/>
- Nies, A. T., and Kepler, D. (2007). The apical conjugate efflux pump ABC2 (MRP2). *Pflugers. Arch.* **453**, 643–659.
- Olson, H., Betton, G., Robinson, D., Thomas, K., Monroe, A., Kolaja, G., Lilly, P., Sanders, J., Sipes, G., Bracken, W., *et al.* (2000). Concordance of the toxicity of pharmaceuticals in humans and in animals. *Regul. Toxicol. Pharmacol.* **32**, 56–67.
- Palmeira, C. M., and Rolo, A. P. (2004). Mitochondrially-mediated toxicity of bile acids. *Toxicology* **203**, 1–15.
- Pedersen, J. M., Matsson, P., Bergström, C. A., Norinder, U., Hoogstraate, J., and Artursson, P. (2008). Prediction and identification of drug interactions with the human ATP-binding cassette transporter multidrug-resistance associated protein 2 (MRP2; ABC2). *J. Med. Chem.* **51**, 3275–3287.
- Rogue, A., Spire, C., Brun, M., Claude, N., and Guillouzo, A. (2010). Gene expression changes induced by PPAR gamma agonists in animal and human liver. *PPAR Res.* **2010**, 325183.
- Rolo, A. P., Palmeira, C. M., Holy, J. M., and Wallace, K. B. (2004). Role of mitochondrial dysfunction in combined bile acid-induced cytotoxicity: The switch between apoptosis and necrosis. *Toxicol. Sci.* **79**, 196–204.
- Rolo, A. P., Palmeira, C. M., and Wallace, K. B. (2003). Mitochondrially mediated synergistic cell killing by bile acids. *Biochim. Biophys. Acta* **1637**, 127–132.
- Stepan, A. F., Walker, D. P., Bauman, J., Price, D. A., Baillie, T. A., Kalgutkar, A. S., and Aleo, M. D. (2011). Structural alert/reactive metabolite concept as applied in medicinal chemistry to mitigate the risk of idiosyncratic drug toxicity: A perspective based on the critical examination of trends in the top 200 drugs marketed in the United States. *Chem. Res. Toxicol.* **24**, 1345–1410.
- Stieger, B. (2010). Role of the bile salt export pump, BSEP, in acquired forms of cholestasis. *Drug Metab. Rev.* **42**, 437–445.
- Stieger, B., Fattinger, K., Madon, J., Kullak-Ublick, G. A., and Meier, P. J. (2000). Drug- and estrogen-induced cholestasis through inhibition of the hepatocellular bile salt export pump (Bsep) of rat liver. *Gastroenterology* **118**, 422–430.
- Stieger, B., Meier, Y., and Meier, P. J. (2007). The bile salt export pump. *Pflugers. Arch.* **453**, 611–620.
- Stine, J. G., and Lewis, J. H. (2011). Drug-induced liver injury: A summary of recent advances. *Expert Opin. Drug Metab. Toxicol.* **7**, 875–890.
- Trauner, M., and Boyer, J. L. (2003). Bile salt transporters: Molecular characterization, function, and regulation. *Physiol. Rev.* **83**, 633–671.
- Tujios, S., and Fontana, R. J. (2011). Mechanisms of drug-induced liver injury: From bedside to bench. *Nat. Rev. Gastroenterol. Hepatol.* **8**, 202–211.
- van Staden, C. J., Morgan, R. E., Ramachandran, B., Chen, Y., Lee, P. H., and Hamadeh, H. K. (2012). Membrane vesicle ABC transporter assays for drug safety assessment. *Curr. Protoc. Toxicol.* **Chapter 23**, Unit 23.5.
- Zhou, S. F., Wang, L. L., Di, Y. M., Xue, C. C., Duan, W., Li, C. G., and Li, Y. (2008). Substrates and inhibitors of human multidrug resistance associated proteins and the implications in drug development. *Curr. Med. Chem.* **15**, 1981–2039.
- Zollner, G., Marschall, H. U., Wagner, M., and Trauner, M. (2006). Role of nuclear receptors in the adaptive response to bile acids and cholestasis: Pathogenetic and therapeutic considerations. *Mol. Pharm.* **3**, 231–251.
- Zollner, G., Wagner, M., and Trauner, M. (2010). Nuclear receptors as drug targets in cholestasis and drug-induced hepatotoxicity. *Pharmacol. Ther.* **126**, 228–243.
